# Supplementary material for: Racial/Ethnic Differences in Association of Fasting Glucose–Associated Genomic Loci With Fasting Glucose, HOMA-B, and Impaired Fasting Glucose in the U.S. Adult Population
Source: PubMed Central journal article supplement — Diabetes Care. 2010 Aug 30;33(11):2370–7. doi: 10.2337/dc10-0898 (PMC2963497; doi:10.2337/dc10-0898), 2010-08-30
Supplement: supp_dc10-0898_dc100898OnlineAppendix.pdf [file supp_dc10-0898_dc100898OnlineAppendix.pdf]

## ONLINE APPENDIX

### Power Calculation

We used Quanto for power calculations.<sup>1</sup> For the study of individual SNPs, assuming an additive model and allele frequency of 40%, we had 80% power to detect a per-allele effect on FG of 0.058, 0.067, and 0.067mmol/L or higher for non-Hispanic whites, non-Hispanic blacks, and Mexican Americans, respectively. For IFG risk, assuming an allele frequency of 20%, we had 80% power to detect a per-allele odds ratio (OR) of at least 1.33, 1.42, and 1.36 for the 3 racial/ethnic groups, respectively. For the GRS with the same assumptions, we had 80% power to detect a per-allele effect on FG of 0.016, 0.019, and 0.019mmol/L. For IFG risk, the corresponding ORs were 1.09, 1.11, and 1.11, respectively.

### References

1. Gauderman WJ. Sample size requirements for association studies of gene-gene interaction. *Am J Epidemiol.* 2002;155(5):478-484.

**Online-Appendix Table 1. Weighted Allele and Genotype Frequencies of 16 Fasting Glucose-associated Single Nucleotide Polymorphisms by Race/ethnicity, Third National Health and Nutrition Examination Survey DNA Bank (NHANES III 1991-1994)**

| SNP        | Chromosome | Nearest gene   | Risk allele (+/-)† | Non-Hispanic white    |                                  |                     |                     |                     | Non-Hispanic black    |                                  |                     |                     |                     | Mexican American      |                                  |                     |                     |                     |
|------------|------------|----------------|--------------------|-----------------------|----------------------------------|---------------------|---------------------|---------------------|-----------------------|----------------------------------|---------------------|---------------------|---------------------|-----------------------|----------------------------------|---------------------|---------------------|---------------------|
|            |            |                |                    | Risk allele frequency | HapMap CEU risk allele frequency | Non-carrier         | Heterozygous        | Homozygous          | Risk allele frequency | HapMap ASW risk allele frequency | Non-carrier         | Heterozygous        | Homozygous          | Risk allele frequency | HapMap MEX risk allele frequency | Non-carrier         | Heterozygous        | Homozygous          |
| rs340874   | 1          | <i>PROX1</i>   | C/T                | 52.4<br>(48.9-55.9)   | 56.2                             | 22.8<br>(18.7-27.6) | 49.5<br>(45.8-53.3) | 27.6<br>(24.4-31.1) | 21.9<br>(19.2-24.8)   | 16.0                             | 60.5<br>(55.6-65.2) | 35.2<br>(31.2-39.5) | 4.3<br>(3.2-5.8)    | 41.2<br>(38.2-44.2)   | 43.0                             | 35.9<br>(32.5-39.5) | 45.9<br>(43.8-48.0) | 18.2<br>(15.6-21.2) |
| rs573225   | 2          | <i>G6PC2</i>   | A/G                | 69.9<br>(67.7-72.1)   | 65.5                             | 8.7<br>(6.7-11.2)   | 42.8<br>(38.7-47.0) | 48.6<br>(44.9-52.2) | 92.6<br>(90.9-93.9)   | 94.3                             | n/a                 | 14.0<br>(11.6-16.6) | 86.0<br>(82.6-89.6) | 82.6<br>(79.8-85.1)   | 83.0                             | 3.3<br>(2.4-4.4)    | 28.2<br>(23.5-33.4) | 68.5<br>(63.3-73.3) |
| rs780094   | 2          | <i>GCKR</i>    | C/T                | 58.3<br>(55.9-60.6)   | 60.6                             | 15.4<br>(12.9-18.3) | 52.7<br>(49.3-56.0) | 31.9<br>(28.9-35.1) | 80.8<br>(78.7-82.7)   | 85.8                             | 4.0<br>(2.8-5.7)    | 30.4<br>(27.0-34.0) | 65.6<br>(62.0-69.0) | 65.1<br>(62.1-67.9)   | 71.4                             | 12.3<br>(9.8-15.3)  | 45.4<br>(41.4-49.4) | 42.4<br>(38.2-46.6) |
| rs11708067 | 3          | <i>ADCY5</i>   | A/G                | 77.8<br>(75.4-80.0)   | 77.4                             | 4.0<br>(2.8-5.9)    | 36.3<br>(32.7-40.0) | 59.7<br>(55.7-63.5) | 85.3<br>(83.2-87.2)   | 81.1                             | 1.9<br>(1.1-3.0)    | 25.7<br>(22.8-28.9) | 72.4<br>(68.8-75.8) | 72.4<br>(69.8-75.0)   | 65.0                             | 9.0<br>(7.0-11.5)   | 37.2<br>(33.3-41.2) | 53.9<br>(49.8-57.9) |
| rs11920090 | 3          | <i>SLC2A2</i>  | T/A                | 85.4<br>(83.8-86.8)   | 85.3                             | 2.7<br>(1.6-4.6)    | 23.8<br>(21.2-26.6) | 73.5<br>(70.9-75.9) | 66.0<br>(63.8-68.1)   | 66.7 <sup>1</sup>                | 12.2<br>(10.5-14.2) | 43.6<br>(39.9-47.4) | 44.2<br>(40.6-47.8) | 86.5<br>(84.0-88.7)   | n/a                              | 2.0<br>(1.3-2.9)    | 23.0<br>(19.8-26.7) | 75.0<br>(70.8-78.8) |
| rs2191349  | 7          | <i>DGKB</i>    | T/G                | 54.7<br>(52.7-56.6)   | 53.3                             | 19.5<br>(17.1-22.2) | 51.6<br>(48.8-54.4) | 28.8<br>(26.6-31.1) | 57.9<br>(55.8-59.9)   | 40.7 <sup>*</sup>                | 17.6<br>(14.9-20.6) | 49.1<br>(44.9-53.4) | 33.3<br>(30.3-36.4) | 41.9<br>(38.2-45.7)   | n/a                              | 34.5<br>(30.4-38.7) | 47.3<br>(43.6-51.0) | 18.3<br>(14.5-22.8) |
| rs4607517  | 7          | <i>GCK</i>     | A/G                | 17.1<br>(15.3-18.9)   | 19.5                             | 69.4<br>(66.5-72.2) | 27.1<br>(24.5-29.9) | 3.5<br>(2.4-5.2)    | 9.4<br>(7.6-11.7)     | 10.4                             | 82.6<br>(78.9-85.8) | 15.9<br>(13.2-19.0) | 1.5<br>(0.9-2.5)    | 21.8<br>(19.8-23.8)   | 14.0                             | 61.5<br>(58.0-64.9) | 33.5<br>(29.7-37.5) | 5.0<br>(3.4-7.3)    |
| rs11558471 | 8          | <i>SLC30A8</i> | A/G                | 69.0<br>(65.6-72.2)   | 74.8                             | 10.0<br>(7.6-13.0)  | 42.1<br>(38.9-45.2) | 48.0<br>(43.6-52.4) | 88.7<br>(86.9-90.3)   | 81.1                             | 2.4<br>(1.5-3.7)    | 17.9<br>(15.1-21.2) | 79.7<br>(76.5-82.6) | 72.9<br>(70.7-75.0)   | 81.0                             | 8.0<br>(6.2-10.2)   | 38.1<br>(34.4-42.0) | 53.9<br>(50.3-57.4) |
| rs7034200  | 9          | <i>GLIS3</i>   | A/C                | 51.3<br>(48.9-53.7)   | 52.5                             | 24.2<br>(21.2-27.4) | 49.0<br>(46.2-51.9) | 26.8<br>(24.4-29.4) | 62.6<br>(60.3-64.8)   | 58.5 <sup>*</sup>                | 13.6<br>(11.5-16.0) | 47.6<br>(44.3-51.0) | 38.8<br>(35.5-42.1) | 52.3<br>(50.4-54.2)   | n/a                              | 21.4<br>(19.1-23.9) | 52.6<br>(50.4-54.8) | 26.0<br>(24.0-28.0) |
| rs10885122 | 10         | <i>ADRA2A</i>  | G/T                | 86.1<br>(84.7-87.4)   | 90.0                             | 2.2<br>(1.2-4.1)    | 23.4<br>(20.4-26.6) | 74.4<br>(71.8-76.9) | 34.9<br>(32.6-37.2)   | 21.7 <sup>*</sup>                | 44.0<br>(40.4-47.5) | 42.3<br>(38.7-46.0) | 13.7<br>(11.8-16.0) | 82.9<br>(80.8-84.9)   | n/a                              | 2.9<br>(2.1-4.0)    | 28.3<br>(24.8-32.2) | 68.8<br>(64.9-72.4) |
| rs7903146  | 10         | <i>TCF7L2</i>  | T/C                | 29.1<br>(26.8-31.6)   | 27.9                             | 51.8<br>(49.0-54.6) | 38.1<br>(35.3-41.1) | 10.0<br>(7.6-13.3)  | 26.7<br>(25.3-28.2)   | 33.7                             | 53.9<br>(51.3-56.5) | 38.8<br>(35.7-42.1) | 7.3<br>(5.8-9.1)    | 18.0<br>(16.3-19.8)   | 25.0                             | 66.0<br>(63.0-69.0) | 32.0<br>(29.2-34.9) | 2.0<br>(1.2-3.3)    |
| rs10830963 | 11         | <i>MTNR1B</i>  | G/C                | 28.0<br>(25.8-30.3)   | 30.0                             | 51.6<br>(48.0-55.2) | 40.8<br>(37.7-44.0) | 7.6<br>(6.2-9.3)    | 7.9<br>(6.4-9.8)      | 3.8 <sup>*</sup>                 | 85.3<br>(81.8-88.2) | 13.6<br>(10.5-17.3) | 1.2<br>(0.5-2.7)    | 21.1<br>(18.5-24.0)   | 25.0                             | 62.6<br>(58.5-66.5) | 32.6<br>(29.2-36.1) | 4.8<br>(3.0-7.6)    |
| rs174550   | 11         | <i>FADS1</i>   | T/C                | 66.5<br>(63.9-69.0)   | 63.3                             | 11.4<br>(10.2-12.8) | 44.2<br>(40.0-48.5) | 44.4<br>(40.0-48.9) | 89.8<br>(87.6-91.6)   | 98.3 <sup>*</sup>                | 1.8<br>(0.9-3.6)    | 16.8<br>(14.2-19.8) | 81.4<br>(77.9-84.4) | 39.2<br>(34.5-44.1)   | n/a                              | 39.3<br>(32.9-46.0) | 43.0<br>(37.5-48.7) | 17.7<br>(13.8-22.5) |
| rs11605924 | 11         | <i>CRY2</i>    | A/C                | 48.3<br>(45.5-51.2)   | 54.2                             | 26.9<br>(23.5-30.5) | 49.7<br>(46.8-52.5) | 23.5<br>(20.8-26.4) | 85.4<br>(83.3-87.3)   | 88.2                             | 2.7<br>(1.6-4.4)    | 23.8<br>(20.8-27.0) | 73.6<br>(70.1-76.7) | 50.0<br>(46.5-53.6)   | n/a                              | 24.8<br>(21.7-28.2) | 50.2<br>(48.0-52.5) | 24.9<br>(21.0-29.3) |
| rs7944584  | 11         | <i>MADD</i>    | A/T                | 71.4<br>(68.9-73.8)   | 71.2                             | 8.6<br>(7.0-10.4)   | 40.0<br>(36.7-43.4) | 51.4<br>(47.5-55.2) | 93.7<br>(91.7-95.3)   | 92.5                             | 0.8<br>(0.3-2.4)    | 10.8<br>(8.1-14.4)  | 88.3<br>(84.7-91.2) | 84.3<br>(82.0-86.3)   | 78.0                             | 3.6<br>(1.9-6.6)    | 24.3<br>(21.3-27.7) | 72.1<br>(68.9-75.1) |
| rs11071657 | 15         | <i>C2CD4B</i>  | A/G                | 64.2<br>(62.0-66.4)   | 59.2                             | 11.8<br>(9.7-14.1)  | 48.0<br>(43.2-52.8) | 40.2<br>(36.3-44.3) | 86.4<br>(83.7-88.6)   | 94.2 <sup>*</sup>                | 1.7<br>(0.7-3.7)    | 24.0<br>(20.6-27.7) | 74.4<br>(70.1-78.2) | 49.2<br>(46.1-52.3)   | n/a                              | 27.3<br>(24.4-30.5) | 47.0<br>(43.7-50.2) | 25.7<br>(21.9-29.8) |

Abbreviations: CEU, Utah residents with Northern and Western European ancestry from the CEPH collection; ASW, African ancestry in Southwest USA; MEX, Mexican ancestry in Los Angeles, California; n/a: not available; NHANES, Third National Health and Nutrition Examination Survey DNA Bank. Data and 95% confidence intervals are in parentheses.

\*HapMap estimate for Yoruba in Ibadan, Nigeria.

† FG rising allele (+) is denoted first.

**Online-Appendix Table 2. Regression Coefficients of 16 Fasting Glucose-associated Single Nucleotide Polymorphisms on Fasting Glucose Levels and Homeostasis Model Assessed Beta-cell Function by Race/ethnicity, Third National Health and Nutrition Examination Survey DNA Bank (NHANES III 1991-1994)**

| SNPs                                  | Non-Hispanic white     |                              | Non-Hispanic black     |                              | Mexican American       |                              | <i>P</i> -value for heterogeneity <sup>‡</sup> |
|---------------------------------------|------------------------|------------------------------|------------------------|------------------------------|------------------------|------------------------------|------------------------------------------------|
|                                       | $\beta$ -coefficient*  | <i>P</i> -value <sup>†</sup> | $\beta$ -coefficient*  | <i>P</i> -value <sup>†</sup> | $\beta$ -coefficient*  | <i>P</i> -value <sup>†</sup> |                                                |
| <b>rs340874 (nr. <i>PROX1</i>)</b>    |                        |                              |                        |                              |                        |                              |                                                |
| Fasting glucose (mmol/L)              | 0.006 (-0.052, 0.063)  | 0.842                        | -0.001 (-0.057, 0.055) | 0.971                        | 0.014 (-0.046, 0.073)  | 0.642                        | 0.918                                          |
| HOMA-B                                | 1.86 (-4.67, 8.39)     | 0.561                        | 3.96 (-9.19, 17.10)    | 0.539                        | -1.19 (-18.54, 16.16)  | 0.889                        | 0.916                                          |
| <b>rs573225 (nr. <i>G6PC2</i>)</b>    |                        |                              |                        |                              |                        |                              |                                                |
| Fasting glucose (mmol/L)              | 0.078 (0.038, 0.119)   | <0.001                       | 0.030 (-0.091, 0.151)  | 0.610                        | 0.095 (0.012, 0.178)   | 0.026                        | 0.592                                          |
| HOMA_B                                | -11.14 (-21.79, -0.49) | 0.041                        | -4.20 (-28.87, 20.47)  | 0.728                        | -7.96 (-25.02, 9.11)   | 0.345                        | 0.906                                          |
| <b>rs780094 (nr. <i>GCKR</i>)</b>     |                        |                              |                        |                              |                        |                              |                                                |
| Fasting glucose (mmol/L)              | 0.063 (0.013, 0.114)   | 0.016                        | 0.012 (-0.055, 0.080)  | 0.705                        | 0.036 (-0.019, 0.092)  | 0.189                        | 0.411                                          |
| HOMA_B                                | -4.02 (-11.57, 3.54)   | 0.283                        | -1.31 (-16.97, 14.35)  | 0.864                        | -1.23 (-14.16, 11.70)  | 0.846                        | 0.583                                          |
| <b>rs11708067 (nr. <i>ADCY5</i>)</b>  |                        |                              |                        |                              |                        |                              |                                                |
| Fasting glucose (mmol/L)              | 0.039 (-0.020, 0.098)  | 0.181                        | 0.063 (-0.035, 0.161)  | 0.199                        | 0.028 (-0.020, 0.076)  | 0.242                        | 0.804                                          |
| HOMA_B                                | 1.67 (-6.60, 9.94)     | 0.680                        | -16.25 (-31.00, -1.49) | 0.032                        | -14.59 (-26.23, -2.94) | 0.016                        | 0.016                                          |
| <b>rs11920090 (nr. <i>SLC2A2</i>)</b> |                        |                              |                        |                              |                        |                              |                                                |
| Fasting glucose (mmol/L)              | 0.037 (-0.029, 0.102)  | 0.259                        | 0.050 (-0.020, 0.121)  | 0.149                        | 0.048 (-0.079, 0.176)  | 0.442                        | 0.931                                          |
| HOMA_B                                | -16.40 (-34.44, 1.64)  | 0.073                        | -2.62 (-13.25, 8.01)   | 0.615                        | -13.23 (-29.41, 2.95)  | 0.104                        | 0.246                                          |
| <b>rs2191349 (nr. <i>DGKB</i>)</b>    |                        |                              |                        |                              |                        |                              |                                                |
| Fasting glucose (mmol/L)              | -0.009 (-0.046, 0.027) | 0.601                        | 0.062 (-0.001, 0.125)  | 0.054                        | -0.001 (-0.050, 0.048) | 0.960                        | 0.130                                          |
| HOMA_B                                | 5.70 (-1.95, 13.35)    | 0.137                        | -11.19 (-20.12, -2.26) | 0.016                        | -9.53 (-21.28, 2.22)   | 0.107                        | 0.007                                          |

|                                 |                        |       |                        |       |                        |       |       |
|---------------------------------|------------------------|-------|------------------------|-------|------------------------|-------|-------|
| <b>rs4607517 (nr. GCK)</b>      |                        |       |                        |       |                        |       |       |
| Fasting glucose (mmol/L)        | 0.017 (-0.051, 0.085)  | 0.615 | 0.011 (-0.069, 0.090)  | 0.779 | 0.088 (0.032, 0.145)   | 0.004 | 0.268 |
| HOMA_B                          | -5.80 (-20.70, 9.11)   | 0.429 | 0.17 (-18.47, 18.82)   | 0.985 | -7.07 (-24.64, 10.49)  | 0.413 | 0.907 |
| <b>rs11558471 (nr. SLC30A8)</b> |                        |       |                        |       |                        |       |       |
| Fasting glucose (mmol/L)        | 0.065 (0.019, 0.111)   | 0.008 | 0.071 (-0.020, 0.163)  | 0.121 | -0.035 (-0.092, 0.022) | 0.211 | 0.093 |
| HOMA_B                          | -11.01 (-26.75, 4.73)  | 0.161 | 0.19 (-21.30, 21.67)   | 0.986 | -0.02 (-10.60, 10.56)  | 0.997 | 0.377 |
| <b>rs7034200 (nr. GLIS3)</b>    |                        |       |                        |       |                        |       |       |
| Fasting glucose (mmol/L)        | -0.005 (-0.045, 0.036) | 0.811 | -0.006 (-0.067, 0.055) | 0.847 | 0.044 (-0.006, 0.095)  | 0.082 | 0.434 |
| HOMA_B                          | -1.80 (-9.97, 6.36)    | 0.653 | -3.67 (-17.44, 10.11)  | 0.587 | 16.57 (3.57, 29.58)    | 0.015 | 0.204 |
| <b>rs10885122 (nr. ADRA2A)</b>  |                        |       |                        |       |                        |       |       |
| Fasting glucose (mmol/L)        | -0.060 (-0.122, 0.002) | 0.056 | 0.058 (-0.003, 0.118)  | 0.061 | 0.044 (-0.030, 0.117)  | 0.233 | 0.009 |
| HOMA_B                          | 0.38 (-11.51, 12.26)   | 0.948 | -2.51 (-14.92, 9.89)   | 0.679 | -12.35 (-31.52, 6.81)  | 0.195 | 0.539 |
| <b>rs7903146 (nr. TCF7L2)</b>   |                        |       |                        |       |                        |       |       |
| Fasting glucose (mmol/L)        | 0.007 (-0.039, 0.053)  | 0.752 | 0.032 (-0.028, 0.093)  | 0.278 | 0.025 (-0.033, 0.083)  | 0.380 | 0.637 |
| HOMA_B                          | -1.68 (-14.00, 10.64)  | 0.780 | -2.21 (-16.88, 12.45)  | 0.758 | -14.43 (-32.19, 3.34)  | 0.106 | 0.658 |
| <b>rs10830963 (nr. MTNR1B)</b>  |                        |       |                        |       |                        |       |       |
| Fasting glucose (mmol/L)        | 0.035 (-0.031, 0.102)  | 0.285 | 0.111 (0.039, 0.184)   | 0.004 | 0.068 (0.008, 0.127)   | 0.027 | 0.228 |
| HOMA_B                          | -10.08 (-22.58, 2.42)  | 0.109 | -7.76 (-32.70, 17.17)  | 0.526 | -5.08 (-16.64, 6.49)   | 0.373 | 0.953 |
| <b>rs174550 (nr. FADS1)</b>     |                        |       |                        |       |                        |       |       |
| Fasting glucose (mmol/L)        | -0.024 (-0.057, 0.009) | 0.139 | 0.055 (-0.023, 0.133)  | 0.158 | -0.005 (-0.063, 0.053) | 0.855 | 0.106 |
| HOMA_B                          | 4.52 (-4.10, 13.14)    | 0.290 | -22.19 (-42.16, -2.22) | 0.031 | 1.40 (-8.02, 10.83)    | 0.761 | 0.046 |
| <b>rs11605924 (nr. CRY2)</b>    |                        |       |                        |       |                        |       |       |
| Fasting glucose (mmol/L)        | 0.019 (-0.034, 0.072)  | 0.472 | 0.032 (-0.024, 0.089)  | 0.249 | 0.049 (-0.001, 0.100)  | 0.053 | 0.601 |
| HOMA_B                          | -2.21 (-9.42, 5.00)    | 0.532 | -2.14 (-16.74, 12.46)  | 0.765 | -2.83 (-14.45, 8.78)   | 0.618 | 0.967 |
| <b>rs7944584 (nr. MADD)</b>     |                        |       |                        |       |                        |       |       |
| Fasting glucose (mmol/L)        | 0.017 (-0.036, 0.070)  | 0.516 | -0.040 (-0.118, 0.038) | 0.304 | 0.072 (-0.060, 0.204)  | 0.271 | 0.426 |
| HOMA_B                          | 0.84 (-9.34, 11.02)    | 0.866 | -9.22 (-41.91, 23.46)  | 0.565 | -17.02 (-51.86, 17.82) | 0.323 | 0.489 |
| <b>rs11071657 (nr. C2CD4B)</b>  |                        |       |                        |       |                        |       |       |
| Fasting glucose (mmol/L)        | 0.004 (-0.048, 0.056)  | 0.884 | -0.015 (-0.111, 0.081) | 0.754 | -0.002 (-0.047, 0.042) | 0.910 | 0.927 |
| HOMA_B                          | -4.53 (-13.58, 4.52)   | 0.311 | -1.05 (-20.35, 18.25)  | 0.911 | 12.03 (-1.16, 25.23)   | 0.072 | 0.117 |

Abbreviations: HOMA B, homeostasis model-assessed beta-cell function; NHANES III, Third National Health

and Nutrition Examination Survey DNA Bank. Data and 95% confidence intervals are in parentheses.

\*  $\beta$ -coefficients (95% confidence intervals) of linear regression models adjusted for age and sex.

† *P*-values for  $\beta$ -coefficients are based on Satterthwaite adjusted-F test.

‡ *P*-values for testing differences in effect of each single nucleotide polymorphism on fasting glucose levels and HOMA-B across race/ethnicity groups are based on Satterthwaite adjusted-F statistics.

**Online-Appendix Table 3. Adjusted Mean (95% confidence interval) of Fasting Glucose Levels and Homeostasis Model-assessed Beta-cell Function of 16 Fasting Glucose-associated Single Nucleotide Polymorphisms by Genotype and Race/ethnicity, Third National Health and Nutrition Examination Survey DNA Bank (NHANES III 1991-1994)**

| SNP         | Non-Hispanic white  |                     |                     |                  | Non-Hispanic black  |                     |                     |                  | Mexican American    |                     |                     |                  |
|-------------|---------------------|---------------------|---------------------|------------------|---------------------|---------------------|---------------------|------------------|---------------------|---------------------|---------------------|------------------|
|             | Non carrier         | Heterozygous        | Homozygous          | <i>P</i> -value* | Non carrier         | Heterozygous        | Homozygous          | <i>P</i> -value* | Non carrier         | Heterozygous        | Homozygous          | <i>P</i> -value* |
| rs340874    |                     |                     |                     |                  |                     |                     |                     |                  |                     |                     |                     |                  |
| FG (mmol/L) | 5.20 (5.12-5.27)    | 5.15 (5.12-5.19)    | 5.20 (5.13-5.28)    | 0.9036           | 5.11 (5.04-5.18)    | 5.13 (5.09-5.18)    | 5.04 (4.93-5.15)    | 0.1536           | 5.22 (5.14-5.30)    | 5.23 (5.17-5.29)    | 5.25 (5.15-5.36)    | 0.6375           |
| HOMA_B      | 120.2 (110.0-130.4) | 120.3 (106.1-134.6) | 123.8 (109.1-138.4) | 0.5810           | 157.0 (144.1-169.9) | 157.0 (144.0-170.1) | 176.6 (127.0-226.3) | 0.4663           | 154.3 (137.8-170.9) | 139.2 (131.8-146.5) | 157.3 (122.4-192.2) | 0.8740           |
| rs573225    |                     |                     |                     |                  |                     |                     |                     |                  |                     |                     |                     |                  |
| FG (mmol/L) | 5.04 (4.99-5.09)    | 5.16 (5.12-5.19)    | 5.22 (5.17-5.26)    | <0.0001*         | 5.25 (4.50-6.00)    | 5.07 (4.97-5.18)    | 5.12 (5.07-5.17)    | 0.7273           | 5.12 (4.91-5.32)    | 5.16 (5.07-5.25)    | 5.27 (5.21-5.32)    | 0.1371           |
| HOMA_B      | 135.9 (107.4-164.4) | 126.0 (109.9-142.1) | 114.3 (104.9-123.8) | 0.0877           | 281.1 (154.6-407.6) | 154.3 (134.8-173.7) | 158.0 (145.0-171.1) | 0.0547           | 150.1 (122.7-177.5) | 156.1 (137.3-175.0) | 145.0 (130.1-159.9) | 0.6826           |
| rs780094    |                     |                     |                     |                  |                     |                     |                     |                  |                     |                     |                     |                  |
| FG (mmol/L) | 5.10 (5.02-5.18)    | 5.17 (5.12-5.22)    | 5.23 (5.17-5.28)    | 0.0151*          | 5.16 (5.00-5.32)    | 5.09 (5.01-5.17)    | 5.12 (5.07-5.18)    | 0.6656           | 5.25 (5.12-5.39)    | 5.18 (5.13-5.23)    | 5.28 (5.20-5.36)    | 0.7510           |
| HOMA_B      | 123.3 (104.5-142.0) | 123.5 (109.2-137.8) | 116.6 (105.6-127.7) | 0.4751           | 156.3 (139.3-173.4) | 159.8 (140.6-179.1) | 157.3 (144.6-170.0) | 0.9259           | 163.9 (127.2-200.5) | 141.2 (131.5-150.8) | 151.5 (139.0-164.1) | 0.4873           |
| rs11708067  |                     |                     |                     |                  |                     |                     |                     |                  |                     |                     |                     |                  |
| FG (mmol/L) | 5.10 (4.99-5.22)    | 5.16 (5.11-5.21)    | 5.19 (5.16-5.23)    | 0.1366           | 5.16 (4.88-5.44)    | 5.05 (4.96-5.14)    | 5.14 (5.08-5.19)    | 0.8651           | 5.18 (5.04-5.32)    | 5.22 (5.16-5.28)    | 5.24 (5.17-5.32)    | 0.3711           |
| HOMA_B      | 117.6 (91.8-143.3)  | 120.5 (107.4-133.6) | 121.9 (109.7-134.1) | 0.7034           | 161.3 (105.3-217.3) | 173.0 (152.9-193.2) | 152.6 (144.1-161.2) | 0.7406           | 177.9 (156.1-199.6) | 150.9 (134.4-167.4) | 141.7 (129.8-153.6) | 0.0014†          |
| rs11920090  |                     |                     |                     |                  |                     |                     |                     |                  |                     |                     |                     |                  |
| FG (mmol/L) | 5.13 (4.88-5.37)    | 5.15 (5.08-5.22)    | 5.19 (5.15-5.22)    | 0.6118           | 5.10 (4.98-5.23)    | 5.07 (5.01-5.12)    | 5.16 (5.08-5.24)    | 0.3964           | 5.13 (4.90-5.35)    | 5.20 (5.04-5.35)    | 5.24 (5.19-5.29)    | 0.3354           |
| HOMA_B      | 131.3 (104.1-158.6) | 136.8 (110.7-162.9) | 115.8 (105.5-126.1) | 0.2285           | 176.0 (148.8-203.3) | 150.7 (137.4-164.0) | 160.3 (146.5-174.0) | 0.2017           | 164.7 (126.9-202.5) | 159.1 (135.3-182.9) | 144.6 (133.5-155.7) | 0.2591           |
| rs2191349   |                     |                     |                     |                  |                     |                     |                     |                  |                     |                     |                     |                  |
| FG (mmol/L) | 5.20 (5.15-5.26)    | 5.17 (5.13-5.20)    | 5.18 (5.11-5.25)    | 0.4860           | 4.99 (4.88-5.09)    | 5.14 (5.08-5.21)    | 5.14 (5.08-5.20)    | 0.0180†          | 5.25 (5.17-5.33)    | 5.20 (5.13-5.26)    | 5.27 (5.18-5.36)    | 0.7319           |
| HOMA_B      | 115.1 (99.5-130.8)  | 120.6 (108.9-132.2) | 126.5 (110.3-142.7) | 0.1186           | 161.8 (143.2-180.5) | 166.3 (150.6-182.1) | 143.8 (135.8-151.8) | 0.0583           | 159.0 (140.5-177.6) | 143.1 (132.3-154.0) | 142.2 (127.3-157.1) | 0.1391           |
| rs4607517   |                     |                     |                     |                  |                     |                     |                     |                  |                     |                     |                     |                  |
| FG (mmol/L) | 5.17 (5.13-5.21)    | 5.21 (5.15-5.27)    | 5.14 (5.02-5.27)    | 0.6812           | 5.11 (5.07-5.16)    | 5.11 (5.01-5.20)    | 5.21 (5.00-5.42)    | 0.3671           | 5.20 (5.12-5.27)    | 5.28 (5.22-5.34)    | 5.39 (5.20-5.58)    | 0.0515           |
| HOMA_B      | 125.4 (112.8-137.9) | 109.7 (96.5-123.0)  | 144.5 (82.0-207.1)  | 0.5039           | 158.0 (148.4-167.6) | 161.1 (134.6-187.7) | 144.2 (115.9-172.5) | 0.3853           | 153.9 (140.0-167.9) | 131.0 (121.0-141.0) | 178.2 (91.1-265.4)  | 0.5668           |

| SNP         | Non-Hispanic white  |                     |                     |                  | Non-Hispanic black  |                     |                     |                  | Mexican American    |                     |                     |                  |
|-------------|---------------------|---------------------|---------------------|------------------|---------------------|---------------------|---------------------|------------------|---------------------|---------------------|---------------------|------------------|
|             | Non carrier         | Heterozygous        | Homozygous          | <i>P</i> -value* | Non carrier         | Heterozygous        | Homozygous          | <i>P</i> -value* | Non carrier         | Heterozygous        | Homozygous          | <i>P</i> -value* |
| rs11558471  |                     |                     |                     |                  |                     |                     |                     |                  |                     |                     |                     |                  |
| FG (mmol/L) | 5.06 (4.98-5.15)    | 5.17 (5.13-5.21)    | 5.21 (5.16-5.27)    | 0.0044*          | 4.97 (4.74-5.20)    | 5.06 (4.96-5.16)    | 5.13 (5.08-5.18)    | 0.1856           | 5.26 (5.19-5.33)    | 5.26 (5.19-5.34)    | 5.21 (5.14-5.29)    | 0.3448           |
| HOMA_B      | 144.1 (89.6-198.7)  | 122.9 (110.4-135.4) | 116.6 (106.9-126.2) | 0.2795           | 138.4 (115.2-161.5) | 164.1 (136.9-191.3) | 158.4 (146.8-169.9) | 0.1276           | 143.1 (117.2-169.1) | 149.5 (133.1-165.9) | 146.9 (135.0-158.9) | 0.7439           |
| rs7034200   |                     |                     |                     |                  |                     |                     |                     |                  |                     |                     |                     |                  |
| FG (mmol/L) | 5.19 (5.14-5.24)    | 5.17 (5.13-5.21)    | 5.18 (5.11-5.25)    | 0.7923           | 5.11 (5.04-5.18)    | 5.12 (5.07-5.17)    | 5.11 (5.01-5.20)    | 0.9259           | 5.21 (5.13-5.28)    | 5.21 (5.12-5.29)    | 5.29 (5.20-5.38)    | 0.0991           |
| HOMA_B      | 125.7 (106.6-144.8) | 118.8 (107.6-130.0) | 121.8 (105.7-138.0) | 0.6291           | 163.6 (130.8-196.5) | 158.6 (147.7-169.5) | 155.7 (142.8-168.6) | 0.6387           | 129.4 (117.9-140.8) | 149.2 (139.4-159.0) | 162.8 (141.3-184.3) | 0.0121*          |
| rs10885122  |                     |                     |                     |                  |                     |                     |                     |                  |                     |                     |                     |                  |
| FG (mmol/L) | 5.26 (5.14-5.38)    | 5.22 (5.15-5.30)    | 5.16 (5.12-5.20)    | 0.0414*          | 5.08 (5.00-5.16)    | 5.11 (5.06-5.17)    | 5.21 (5.12-5.30)    | 0.0334*          | 5.17 (5.01-5.33)    | 5.20 (5.10-5.30)    | 5.24 (5.19-5.30)    | 0.2783           |
| HOMA_B      | 120.3 (107.0-133.6) | 121.0 (104.5-137.5) | 121.3 (108.9-133.8) | 0.9021           | 158.2 (141.1-175.4) | 160.2 (145.8-174.7) | 149.9 (138.0-161.9) | 0.3498           | 163.1 (113.5-212.6) | 157.7 (136.6-178.7) | 143.9 (132.1-155.7) | 0.3718           |
| rs7903146   |                     |                     |                     |                  |                     |                     |                     |                  |                     |                     |                     |                  |
| FG (mmol/L) | 5.17 (5.13-5.22)    | 5.18 (5.15-5.21)    | 5.18 (5.07-5.29)    | 0.8621           | 5.09 (5.04-5.15)    | 5.14 (5.06-5.21)    | 5.14 (4.99-5.29)    | 0.5235           | 5.22 (5.16-5.28)    | 5.26 (5.18-5.33)    | 5.20 (5.03-5.38)    | 0.8381           |
| HOMA_B      | 122.7 (109.8-135.6) | 119.9 (102.4-137.3) | 120.7 (100.9-140.6) | 0.8614           | 161.8 (146.9-176.6) | 149.6 (140.0-159.2) | 174.2 (127.5-220.8) | 0.5913           | 153.4 (139.1-167.7) | 140.4 (127.1-153.6) | 115.9 (94.5-137.2)  | 0.0067*          |
| rs10830963  |                     |                     |                     |                  |                     |                     |                     |                  |                     |                     |                     |                  |
| FG (mmol/L) | 5.16 (5.11-5.22)    | 5.18 (5.12-5.23)    | 5.26 (5.18-5.35)    | 0.0980           | 5.10 (5.05-5.15)    | 5.20 (5.10-5.29)    | 5.39 (5.17-5.61)    | 0.0184*          | 5.21 (5.15-5.27)    | 5.25 (5.17-5.33)    | 5.41 (5.22-5.59)    | 0.0336*          |
| HOMA_B      | 127.2 (109.4-144.9) | 116.4 (106.0-126.7) | 108.2 (95.3-121.2)  | 0.0803           | 159.3 (148.5-170.2) | 149.6 (115.6-183.7) | 154.1 (118.1-190.2) | 0.7858           | 150.9 (137.6-164.2) | 143.6 (131.2-156.0) | 146.2 (119.9-172.5) | 0.7723           |
| rs174550    |                     |                     |                     |                  |                     |                     |                     |                  |                     |                     |                     |                  |
| FG (mmol/L) | 5.23 (5.17-5.30)    | 5.17 (5.13-5.21)    | 5.17 (5.12-5.21)    | 0.0611           | 5.07 (4.74-5.40)    | 5.06 (4.98-5.13)    | 5.12 (5.08-5.17)    | 0.7232           | 5.25 (5.17-5.34)    | 5.19 (5.13-5.25)    | 5.27 (5.15-5.39)    | 0.7999           |
| HOMA_B      | 120.9 (100.3-141.6) | 116.8 (106.0-127.5) | 125.7 (111.3-140.2) | 0.5564           | 163.9 (129.1-198.7) | 182.8 (151.3-214.4) | 152.6 (144.0-161.3) | 0.5413           | 145.8 (136.0-155.7) | 151.3 (137.7-164.8) | 146.9 (123.4-170.4) | 0.9169           |
| rs11605924  |                     |                     |                     |                  |                     |                     |                     |                  |                     |                     |                     |                  |
| FG (mmol/L) | 5.15 (5.10-5.20)    | 5.19 (5.15-5.23)    | 5.18 (5.10-5.27)    | 0.4987           | 5.11 (4.89-5.32)    | 5.08 (5.01-5.15)    | 5.12 (5.07-5.18)    | 0.8759           | 5.21 (5.14-5.27)    | 5.20 (5.14-5.27)    | 5.30 (5.20-5.41)    | 0.0508           |
| HOMA_B      | 125.3 (105.6-145.0) | 119.2 (108.5-130.0) | 121.1 (104.4-137.8) | 0.5449           | 175.1 (138.7-211.5) | 156.4 (142.9-169.9) | 157.8 (144.1-171.6) | 0.3499           | 151.1 (123.7-178.4) | 148.3 (131.7-164.9) | 145.4 (131.5-159.3) | 0.6190           |
| rs7944584   |                     |                     |                     |                  |                     |                     |                     |                  |                     |                     |                     |                  |
| FG (mmol/L) | 5.13 (5.01-5.25)    | 5.18 (5.14-5.22)    | 5.18 (5.14-5.23)    | 0.4205           | 5.35 (5.06-5.65)    | 5.12 (5.03-5.22)    | 5.11 (5.06-5.16)    | 0.0799           | 5.19 (4.83-5.54)    | 5.16 (5.04-5.27)    | 5.25 (5.20-5.31)    | 0.6780           |
| HOMA_B      | 133.2 (107.2-159.1) | 115.2 (103.2-127.3) | 123.9 (110.5-137.3) | 0.3868           | 148.5 (112.1-184.8) | 170.3 (131.6-209.1) | 156.6 (146.2-167.1) | 0.6148           | 194.1 (57.7-330.5)  | 155.0 (132.5-177.4) | 143.8 (132.6-155.0) | 0.4525           |
| rs11071657  |                     |                     |                     |                  |                     |                     |                     |                  |                     |                     |                     |                  |
| FG (mmol/L) | 5.13 (5.06-5.21)    | 5.20 (5.14-5.25)    | 5.17 (5.11-5.22)    | 0.4256           | 4.99 (4.70-5.27)    | 5.15 (5.06-5.24)    | 5.11 (5.05-5.16)    | 0.4409           | 5.24 (5.15-5.33)    | 5.22 (5.16-5.28)    | 5.24 (5.16-5.31)    | 0.9186           |
| HOMA_B      | 123.8 (107.4-140.2) | 124.1 (110.3-138.0) | 117.0 (104.2-129.8) | 0.4886           | 182.3 (141.9-222.6) | 155.7 (137.1-174.3) | 158.2 (144.3-172.2) | 0.2066           | 135.7 (125.2-146.3) | 149.4 (136.2-162.6) | 159.8 (134.4-185.1) | 0.0765           |

Abbreviations: FG, fasting glucose; HOMA-B, homeostasis model assessed beta-cell function; NHANES, Third National Health and Nutrition Examination Survey DNA Bank; SNP, single nucleotide polymorphisms. Data and 95% confidence intervals are in parentheses.

\* *P*-values for testing difference in fasting glucose levels or HOMA-B across genotype are based on Satterthwaite adjusted-F statistics.

**Online-Appendix Table 4. Adjusted Mean Fasting Glucose Levels and Homeostasis Model Assessed Beta-cell Function by Quintiles of Unweighted Genetic Risk Score and Race/ethnicity, Third National Health and Nutrition Examination Survey DNA Bank (NHANES III 1991-1994)**

| Characteristics                        | $\beta$ (SE) <sup>*</sup> | <i>P</i> -value <sup>†</sup> | Quintiles of the 16 SNP Unweighted Genetic Risk Score |                    |                    |                    |                    | <i>P</i> -value <sup>‡</sup> | <i>R</i> <sup>2§</sup> |            |
|----------------------------------------|---------------------------|------------------------------|-------------------------------------------------------|--------------------|--------------------|--------------------|--------------------|------------------------------|------------------------|------------|
|                                        |                           |                              | Q1                                                    | Q2                 | Q3                 | Q4                 | Q5                 |                              | Without Score          | With Score |
| <b>Non-Hispanic white<sup>  </sup></b> |                           |                              |                                                       |                    |                    |                    |                    |                              |                        |            |
| n                                      |                           |                              | 238                                                   | 144                | 371                | 137                | 264                |                              |                        |            |
| GRS range                              |                           |                              | 10 - 16                                               | 17                 | 18 - 19            | 20                 | 21                 |                              |                        |            |
| Fasting glucose (mmol/L)               | 0.020 (0.010)             | 0.052                        | 5.10(5.04-5.15)                                       | 5.14(5.06-5.22)    | 5.20(5.15-5.25)    | 5.21(5.15-5.28)    | 5.22(5.13-5.32)    | 0.058                        | 0.208                  | 0.2217     |
| HOMA_B                                 | -3.0 (1.48)               | 0.054                        | 139.7(110.8-168.6)                                    | 111.9(101.5-122.3) | 122.7(110.8-134.7) | 109.6(98.0-121.1)  | 117.3(103.0-131.7) | 0.091                        | 0.013                  | 0.0253     |
| <b>Non-Hispanic black<sup>  </sup></b> |                           |                              |                                                       |                    |                    |                    |                    |                              |                        |            |
| n                                      |                           |                              | 213                                                   | 143                | 154                | 148                | 163                |                              |                        |            |
| GRS range                              |                           |                              | 12 - 18                                               | 19                 | 20                 | 21                 | 22                 |                              |                        |            |
| Fasting glucose (mmol/L)               | 0.034 (0.009)             | 0.001                        | 5.02(4.94-5.09)                                       | 5.04(4.94-5.14)    | 5.16(5.04-5.28)    | 5.13(5.06-5.19)    | 5.23(5.15-5.32)    | 0.001                        | 0.115                  | 0.1432     |
| HOMA_B                                 | -5.5 (1.55)               | 0.002                        | 166.2(150.6-181.8)                                    | 187.3(143.6-230.9) | 150.0(131.7-168.3) | 147.4(133.6-161.3) | 145.9(130.4-161.5) | 0.004                        | 0.064                  | 0.0806     |
| <b>Mexican American<sup>  </sup></b>   |                           |                              |                                                       |                    |                    |                    |                    |                              |                        |            |
| n                                      |                           |                              | 155                                                   | 114                | 277                | 106                | 193                |                              |                        |            |
| GRS range                              |                           |                              | 10 - 15                                               | 16                 | 17 - 18            | 19                 | 20                 |                              |                        |            |
| Fasting glucose (mmol/L)               | 0.032 (0.007)             | 0.001                        | 5.15(5.05-5.24)                                       | 5.16(5.08-5.25)    | 5.23(5.16-5.30)    | 5.27(5.11-5.43)    | 5.35(5.26-5.44)    | <0.001                       | 0.135                  | 0.156      |
| HOMA_B                                 | -3.5 (1.70)               | 0.052                        | 155.0(132.5-177.4)                                    | 161.1(140.5-181.8) | 154.0(134.9-173.2) | 136.7(125.3-148.0) | 128.8(116.4-141.1) | 0.017                        | 0.043                  | 0.053      |

Abbreviations: FG, fasting glucose; GRS, genetic risk score; HOMA-B, homeostasis model assessed beta-cell function; n = number of participants; NHANES, Third National Health and Nutrition Examination Survey DNA Bank; SE, standard error; SNP, single nucleotide polymorphisms. Data and 95% confidence intervals are in parentheses.

\*  $\beta$ -coefficients of linear regression models adjusted for age and sex.

† *P*-values for  $\beta$ -coefficients based on Satterthwaite adjusted-F test.

‡ *P*-values for testing difference in FG levels or HOMA-B across quintiles of genetic risk score based on Satterthwaite adjusted-F statistics.

§ Adjusted *R*<sup>2</sup> for regression models with and without genetic risk score.

|| *P* = 0.333 and *P* = 0.534 for testing heterogeneity of genetic risk score on FG levels and HOMA-B across race/ethnicity groups based on Satterthwaite adjusted-F statistics respectively.

**Online-Appendix Table 5. Adjusted Prevalence and Odds Ratio for Impaired Fasting Glucose by Quintiles of Unweighted Genetic Risk Score and Race/ethnicity, Third National Health and Nutrition Examination Survey DNA Bank (NHANES III 1991-1994)**

| Characteristics                         | GRS as Continuous Variable | <i>P</i> -value* | Quintiles of the Unweighted Genetic Risk Score |                  |                  |                    |                  |
|-----------------------------------------|----------------------------|------------------|------------------------------------------------|------------------|------------------|--------------------|------------------|
|                                         |                            |                  | Q1                                             | Q2               | Q3               | Q4                 | Q5               |
| <b>Non-Hispanic white</b>               |                            |                  |                                                |                  |                  |                    |                  |
| Number of cases                         | 289                        |                  | 43                                             | 40               | 97               | 37                 | 72               |
| Score range                             | 10 - 27                    |                  | 10 - 16                                        | 17               | 18 - 19          | 20                 | 21               |
| IFG prevalence adjusted for age and sex | 20.4 (16.8-24.0)           |                  | 16.4 (9.9-22.8)                                | 21.2 (13.1-29.3) | 22.9 (17.0-28.7) | 21.6 (13.21-30.02) | 20.9 (13.2-28.6) |
| OR adjusted for age and sex             | 1.05 (0.94-1.18)           | 0.362            | 1                                              | 1.43 (0.62-3.26) | 1.59 (1.03-2.48) | 1.47 (0.61-3.55)   | 1.40 (0.56-3.51) |
| <b>Non-Hispanic black</b>               |                            |                  |                                                |                  |                  |                    |                  |
| Number of cases                         | 145                        |                  | 27                                             | 24               | 30               | 22                 | 42               |
| GRS range                               | 12 - 26                    |                  | 12 - 18                                        | 19               | 20               | 21                 | 22               |
| IFG prevalence adjusted for age and sex | 18.2 (15.4-21.0)           |                  | 12.5 (6.8-18.2)                                | 15.0 (8.8-21.2)  | 20.3 (13.0-27.6) | 18.1 (12.1-24.1)   | 25.9 (20.3-31.4) |
| OR adjusted for age and sex             | 1.16 (1.03-1.30)           | 0.017            | 1                                              | 1.26 (0.60-2.66) | 1.89 (0.82-4.35) | 1.61 (0.79-3.26)   | 2.67 (1.25-5.71) |
| <b>Mexican American</b>                 |                            |                  |                                                |                  |                  |                    |                  |
| Number of cases                         | 227                        |                  | 32                                             | 31               | 66               | 31                 | 67               |
| GRS range                               | 10 - 26                    |                  | 10 - 15                                        | 16               | 17 - 18          | 19                 | 20               |
| IFG prevalence adjusted for age and sex | 24.6 (20.1-29.1)           |                  | 20.0 (12.5-27.6)                               | 25.2 (19.1-31.2) | 23.2 (16.6-29.8) | 27.2 (14.9-39.4)   | 31.4 (24.1-38.6) |
| OR adjusted for age and sex             | 1.09 (1.01-1.19)           | 0.029            | 1                                              | 1.39 (0.71-2.69) | 1.23 (0.79-1.92) | 1.55 (0.80-3.02)   | 1.95 (0.98-3.86) |

Abbreviations: GRS, genetic risk score; IFG, impaired fasting glucose; NHANES, Third National Health and Nutrition Examination Survey DNA Bank OR, odds ratio. Data are and 95% confidence intervals are in parentheses.

\* For prevalence of IFG, adjusted OR, *P*-values for trend test across quintiles of genetic risk score, and *P*-value for using genetic risk score as a continuous variable in logistic regression models are based on Satterthwaite adjusted-F test. *P* = 0.393 for testing heterogeneity of genetic risk score as a continuous variable on risk for IFG across race/ethnicity groups on the basis of Satterthwaite's adjusted-F statistics.



**Online-Appendix Figure 1. Distribution of weighted genetic risk score by race/ethnicity, Third National Health and Nutrition Examination Survey DNA Bank (NHANES III 1991-1994).**

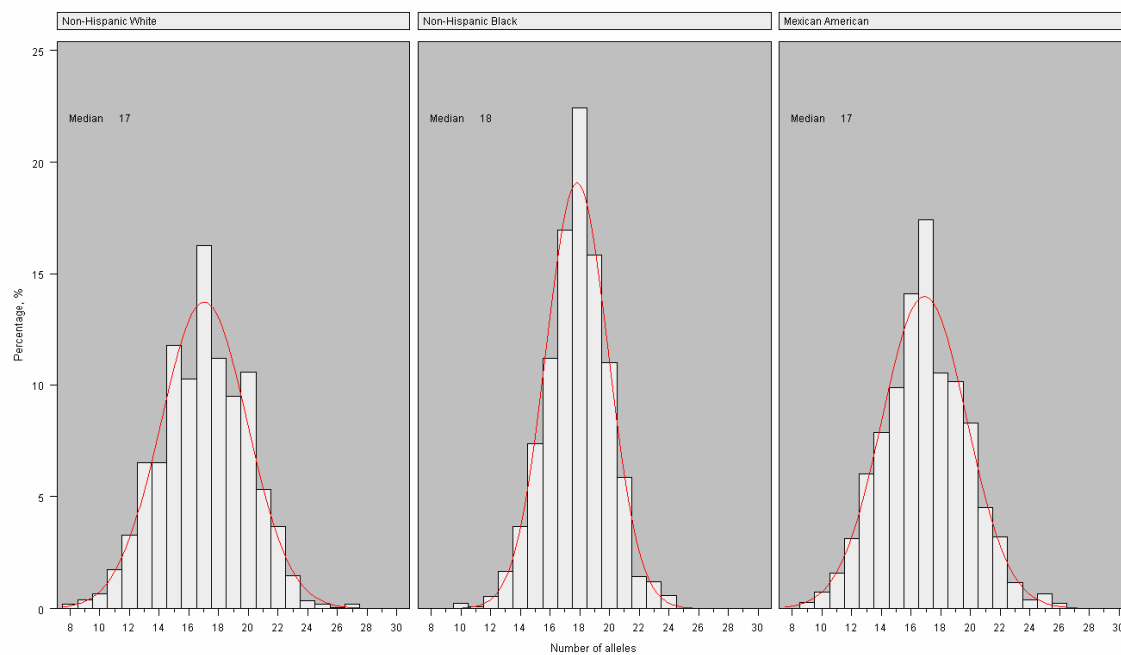

**Online-Appendix Figure 2. Adjusted mean fasting glucose levels (2a) and HOMA-B (2b) by quintiles of weighted genetic risk score and race/ethnicity, Third National Health and Nutritional Examination Survey DNA Bank (NHANES III 1991-1994)**

**2a**

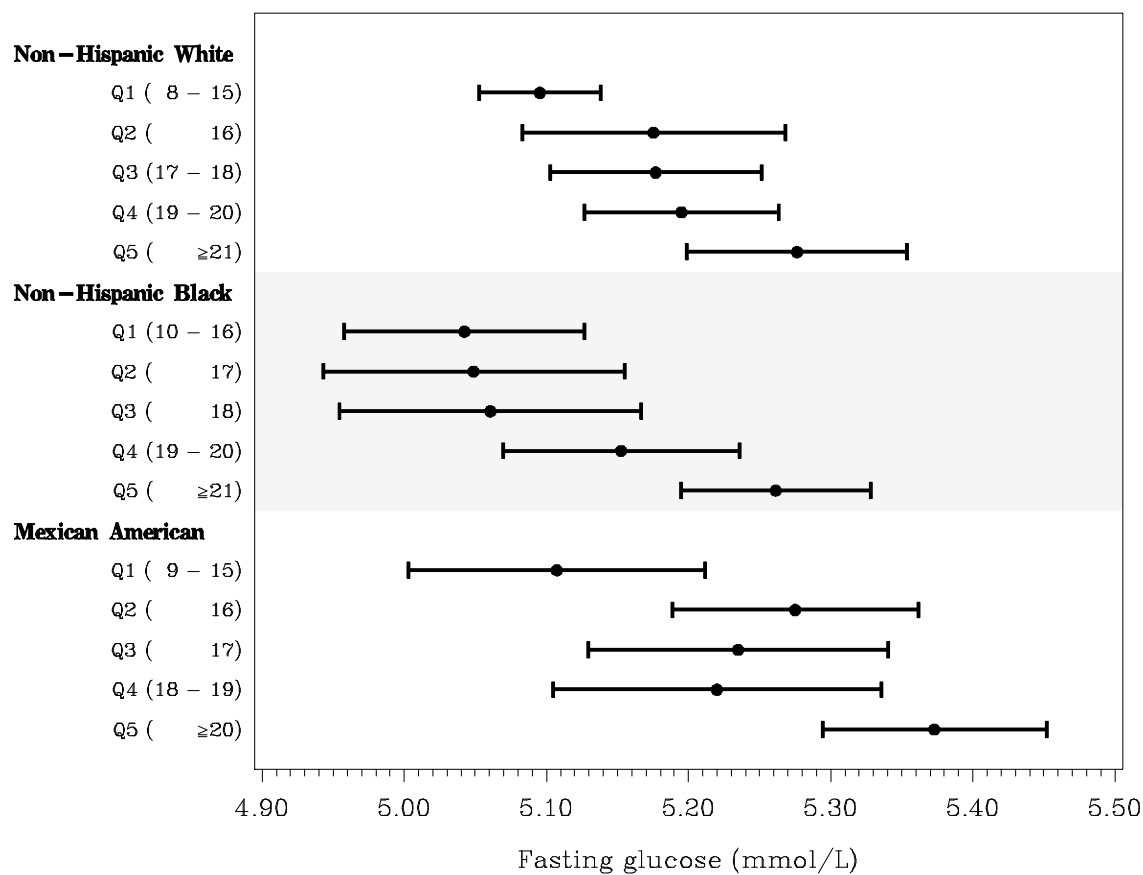

2b

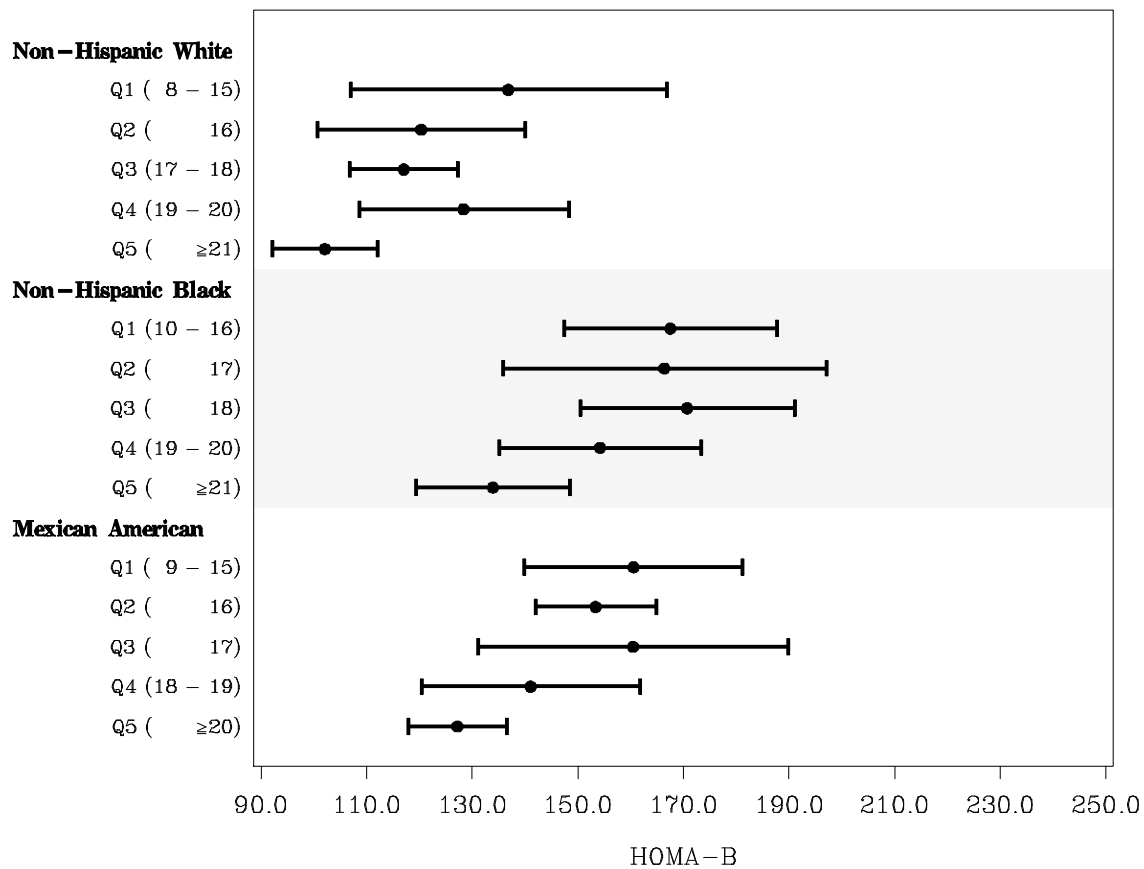

**Online-Appendix Figure 3. Heatmap representations of LD measured as  $D'$  created using Haploview 4.2 for the 16 FG-associated SNPs and surrounding region (+/- 100 kb) among the CEU (first row), ASW (2<sup>nd</sup> row), and MEX (3<sup>rd</sup> row) populations from HapMap release 2.7**

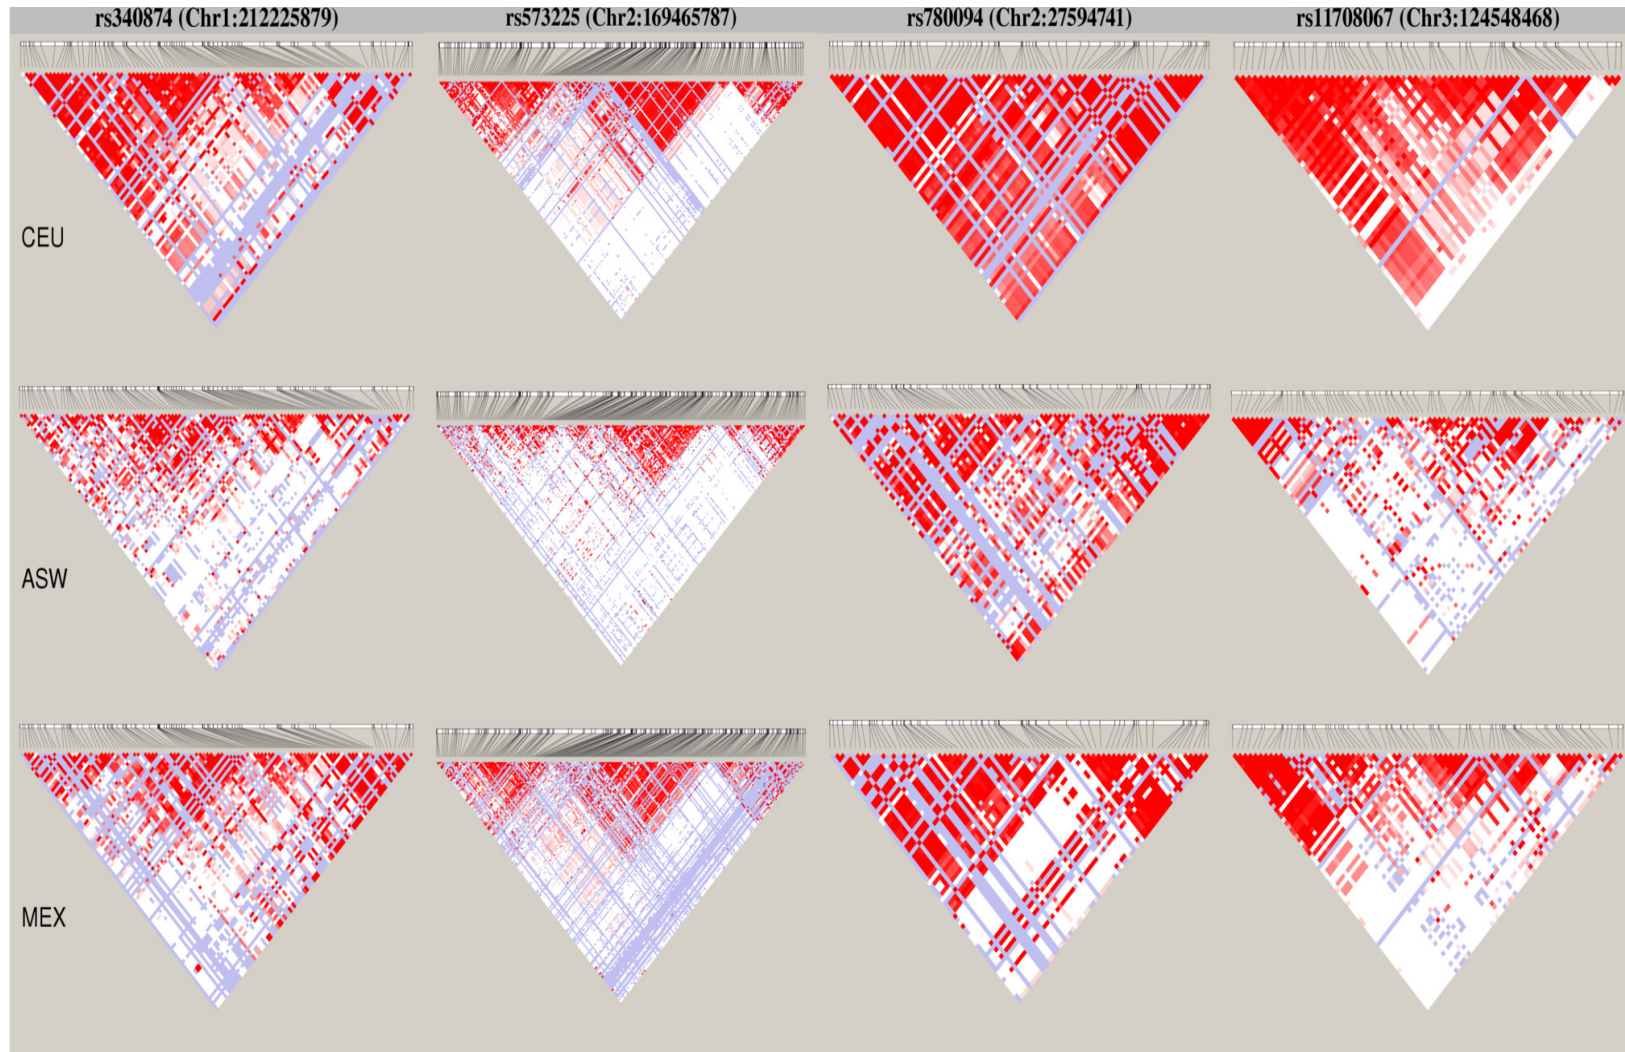

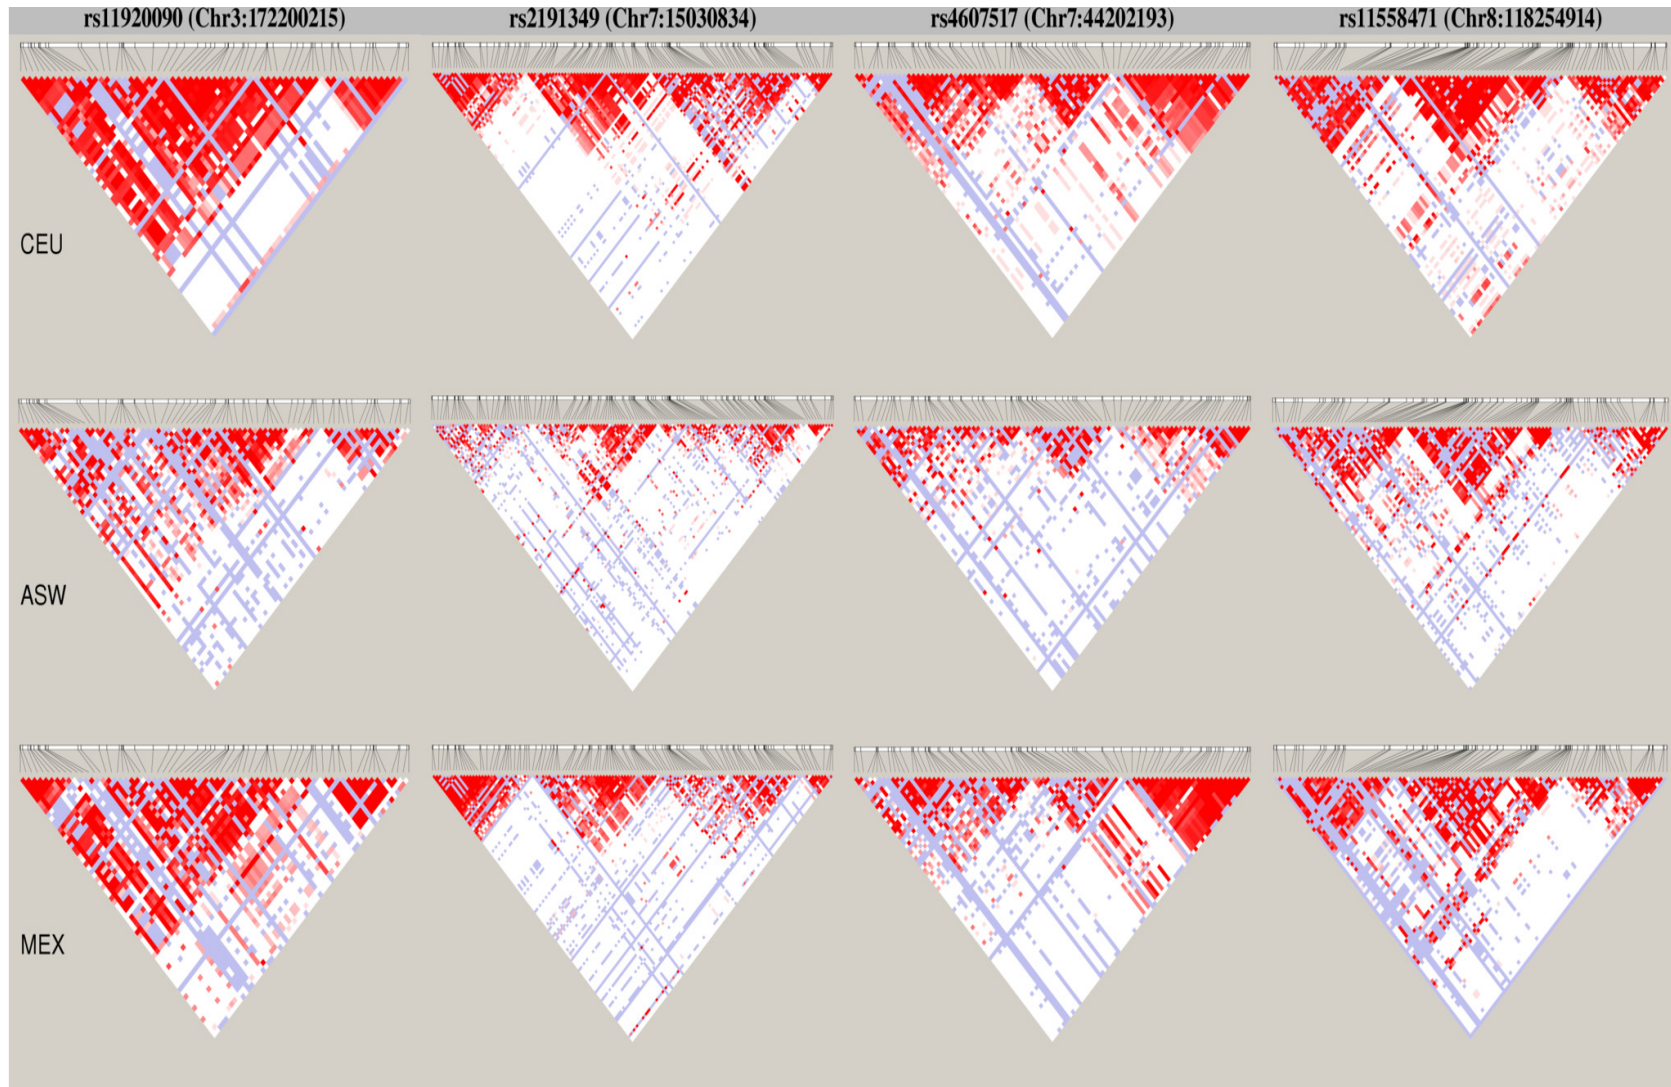

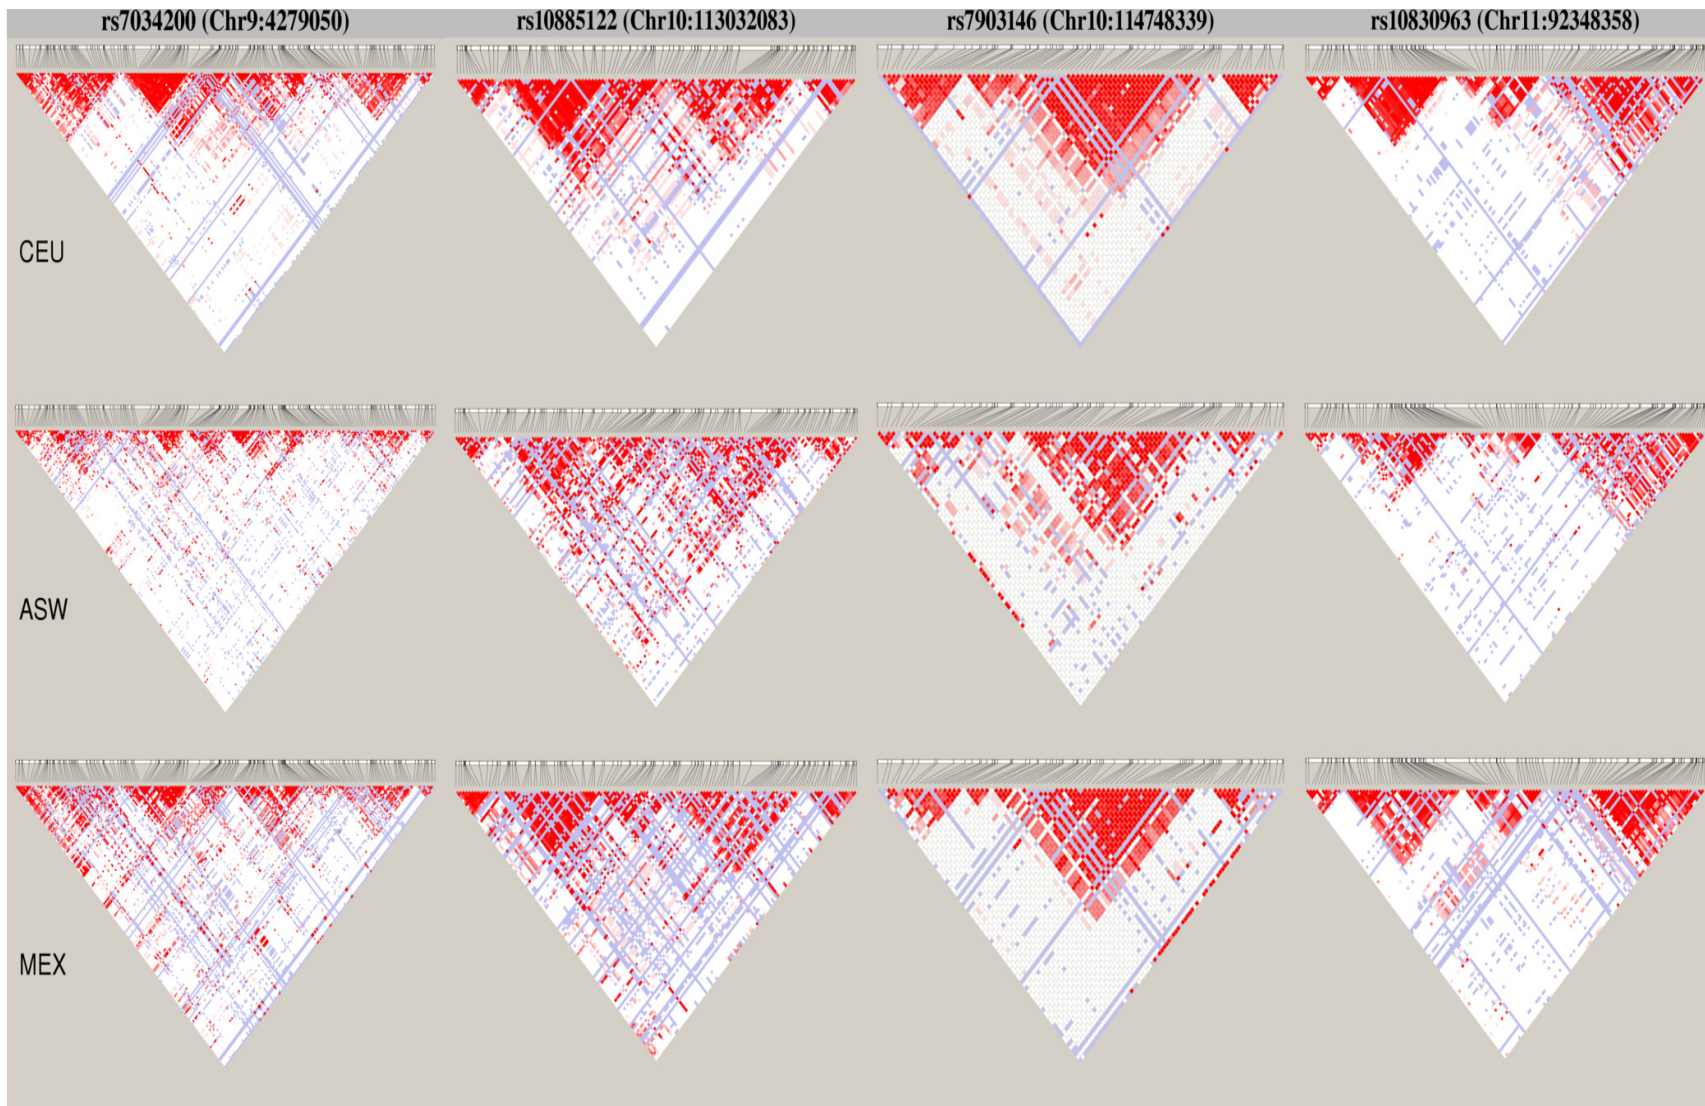

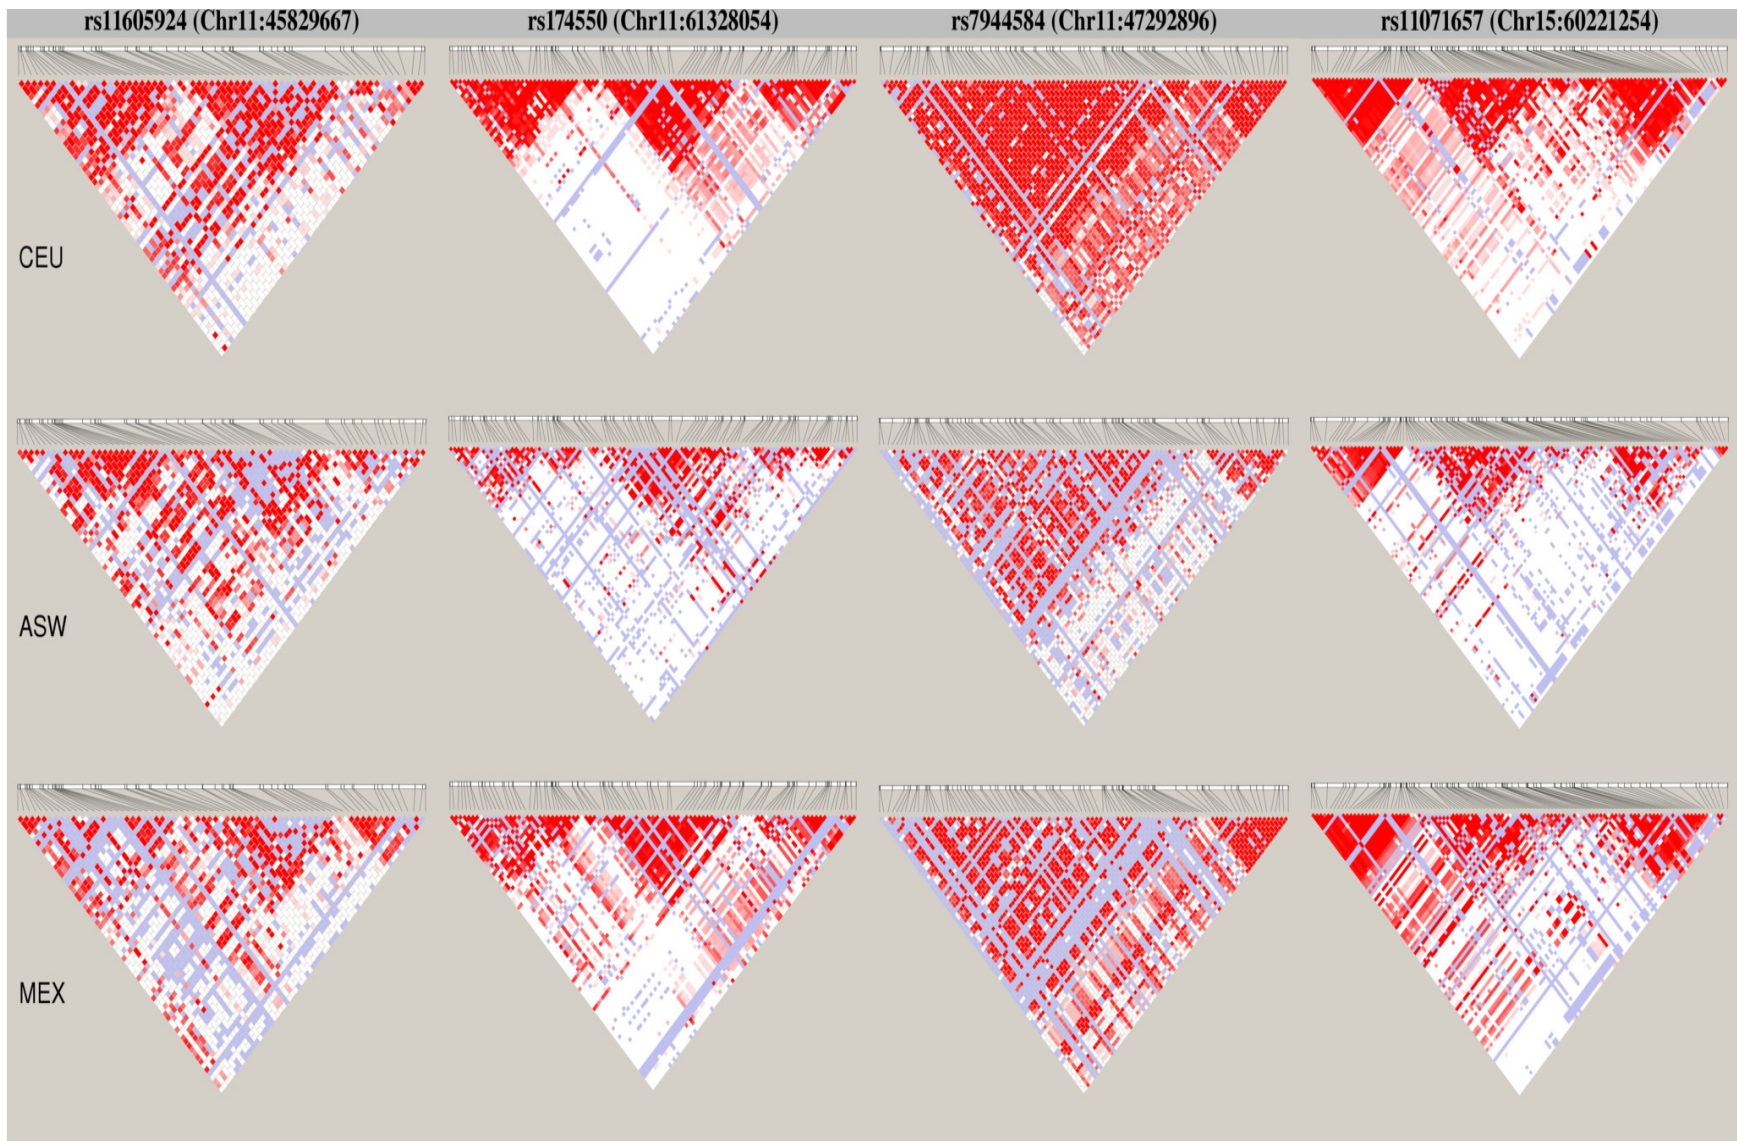

## MAGIC Investigators and Affiliations

Josée Dupuis 1,2,, Claudia Langenberg 3,, Inga Prokopenko 4,5,, Richa Saxena 6,7,, Nicole Soranzo 8,9,, Anne U Jackson 10, Eleanor Wheeler 11, Nicole L Glazer 12, Nabila Bouatia-Naji 13, Anna L Gloyn 4, Cecilia M Lindgren 4,5, Reedik Mägi 4,5, Andrew P Morris 5, Joshua Randall 5, Toby Johnson 14,15,16, Paul Elliott 17, Denis Rybin 18, Gudmar Thorleifsson 19, Valgerdur Steinthorsdottir 19, Peter Henneman 20, Harald Grallert 21, Abbas Dehghan 22, Jouke Jan Hottenga 23, Christopher S Franklin 24, Pau Navarro 25, Kijoung Song 26, Anuj Goel 5,27, John R B Perry 28, Josephine M Egan 29, Taina Lajunen 30, Niels Grarup 31, Thomas Sparsø 31, Alex Doney 32, Benjamin F Voight 6,7, Heather M Stringham 10, Man Li 33, Stavroula Kanoni 34, Peter Shrader 35, Christine Cavalcanti-Proença 13, Meena Kumari 36, Lu Qi 37, Nicholas J Timpson 38, Christian Gieger 21, Carina Zabena 39, Ghislain Rocheleau 40,41, Erik Ingelsson 42,43, Ping An 44, Jeffrey O'Connell 45, Jian'an Luan 3, Amanda Elliott 6,7, Steven A McCarroll 6,7, Felicity Payne 11, Rosa Maria Roccascaccia 11, François Pattou 46, Praveen Sethupathy 47, Kristin Ardlie 48, Yavuz Ariyurek 49, Beverley Balkau 50, Philip Barter 51, John P Beilby 52,53, Yoav Ben-Shlomo 54, Rafn Benediktsson 55,56, Amanda J Bennett 4, Sven Bergmann 14,15, Murielle Bochud 15, Eric Boerwinkle 57, Amélie Bonnefond 13, Lori L Bonnycastle 47, Knut Borch-Johnsen 58,59, Yvonne Böttcher 60, Eric Brunner 36, Suzannah J Bumpstead 8, Guillaume Charpentier 61, Yii-Der Ida Chen 62, Peter Chines 47, Robert Clarke 63, Lachlan J M Coin 17, Matthew N Cooper 64, Marilyn Cornelis 37, Gabe Crawford 6, Laura Crisponi 65, Ian N M Day 38, Eco de Geus 23, Jerome Delplanque 13, Christian Dina 13, Michael R Erdos 47, Annette C Fedson 64,66, Antje Fischer-Rosinsky 67,68, Nita G Forouhi 3, Caroline S Fox 2,69, Rune Frants 70, Maria Grazia Franzosi 71, Pilar Galan 72, Mark O Goodarzi 62, Jürgen Graessler 73, Christopher J Groves 4, Scott Grundy 74, Rhian Gwilliam 8, Ulf Gyllensten 75, Samy Hadjadj 76, Göran Hallmans 77, Naomi Hammond 8, Xijing Han 10, Anna-Liisa Hartikainen 78, Neelam Hassanali 4, Caroline Hayward 25, Simon C Heath 79, Serge Hercberg 80, Christian Herder 81, Andrew A Hicks 82, David R Hillman 66,83, Aroon D Hingorani 36, Albert Hofman 22, Jennie Hui 52,84, Joe Hung 85,86, Bo Isomaa 87,88, Paul R V Johnson 4,89, Torben Jørgensen 90,91, Antti Jula 92, Marika Kaakinen 93, Jaakko Kaprio 94,95,96, Y Antero Kesaniemi 97, Mika Kivimäki 36, Beatrice Knight 98, Seppo Koskinen 99, Peter Kovacs 100, Kirsten Ohm Kyvik 101, G Mark Lathrop 79, Debbie A Lawlor 38, Olivier Le Bacquer 13, Cécile Lecoeur 13, Yun Li 10, Valeriya Lyssenko 102, Robert Mahley 103, Massimo Mangino 9, Alisa K Manning 1, María Teresa Martínez-Larrad 39, Jarred B McAteer 6,104,105, Laura J McCulloch 4, Ruth McPherson 106, Christa Meisinger 21, David Melzer 28, David Meyre 13, Braxton D Mitchell 45, Mario A Morken 47, Sutapa Mukherjee 66,83, Silvia Naitza 65, Narisu Narisu 47, Matthew J Neville 4,107, Ben A Oostra 108, Marco Orrù 65, Ruth Pakyz 45, Colin N A Palmer 109, Giuseppe Paolisso 110, Cristian Pattaro 82, Daniel Pearson 47, John F Peden 5,27, Nancy L. Pedersen 42, Markus Perola 96,111,112, Andreas F H Pfeiffer 67,68, Irene Pichler 82, Ozren Polasek 113, Danielle Posthuma 23,114, Simon C Potter 8, Anneli Pouta 115, Michael A Province 44, Bruce M Psaty 116,117, Wolfgang Rathmann 118, Nigel W Rayner 4,5, Kenneth Rice 119, Samuli Ripatti 96,111, Fernando Rivadeneira 22,120, Michael Roden 81,121, Olov Rolandsson 122, Anneli Sandbaek 123, Manjinder Sandhu 3,124, Serena Sanna 65, Avan Aihie Sayer 125, Paul Scheet 126, Laura J Scott 10, Udo Seedorf 127, Stephen J Sharp 3, Beverley Shields 98, Gunnar Sigursson 55,56, Erik J G Sijbrands 22,120, Angela Silveira 128, Laila Simpson 64,66, Andrew Singleton 129, Nicholas L Smith 130,131, Ulla Sovio 17, Amy Swift 47, Holly Syddall 125, Ann-Christine Syvänen 132, Toshiko Tanaka



133,134, Barbara Thorand 21, Jean Tichet 135, Anke Tönjes 60,136, Tiinamaija Tuomi 87,137, André G Uitterlinden 22,120, Ko Willems van Dijk 70,138, Mandy van Hoek 120, Dhiraj Varma 8, Sophie Visvikis-Siest 139, Veronique Vitart 25, Nicole Vogelzangs 140, Gérard Waeber 141, Peter J Wagner 96,111, Andrew Walley 142, G Bragi Walters 19, Kim L Ward 64,66, Hugh Watkins 5,27, Michael N Weedon 28, Sarah H Wild 24, Gonneke Willemssen 23, Jacqueline C M Witteman 22, John W G Yarnell 143, Eleftheria Zeggini 5,8, Diana Zelenika 79, Björn Zethelius 43,144, Guangju Zhai 9, Jing Hua Zhao 3, M Carola Zillikens 120, DIAGRAM Consortium 145, GIANT Consortium 145, Global BPgen Consortium 145, Ingrid B Borecki 44, Ruth J F Loos 3, Pierre Meneton 80, Patrik K E Magnusson 42, David M Nathan 104,105, Gordon H Williams 69,105, Andrew T Hattersley 98, Kaisa Silander 96,111, Veikko Salomaa 146, George Davey Smith 38, Stefan R Bornstein 73, Peter Schwarz 73, Joachim Spranger 67,68, Fredrik Karpe 4,107, Alan R Shuldiner 45, Cyrus Cooper 125, George V Dedoussis 34, Manuel Serrano-Rios 39, Andrew D Morris 109, Lars Lind 132, Lyle J Palmer 64,66,84, Frank B. Hu 147,148, Paul W Franks 149, Shah Ebrahim 150, Michael Marmot 36, W H Linda Kao 33,151,152, James S Pankow 153, Michael J Sampson 154, Johanna Kuusisto 155, Markku Laakso 155, Torben Hansen 31,156, Oluf Pedersen 31,59,157, Peter Paul Pramstaller 82,158,159, H Erich Wichmann 21,160,161, Thomas Illig 21, Igor Rudan 24,162,163, Alan F Wright 25, Michael Stumvoll 60, Harry Campbell 24, James F Wilson 24, Anders Hamsten on behalf of Procardis consortium 128, Richard N Bergman 164, Thomas A Buchanan 164,165, Francis S Collins 47, Karen L Mohlke 166, Jaakko Tuomilehto 94,167, Timo T Valle 167, David Altshuler 6,7,104,105, Jerome I Rotter 62, David S Siscovick 168, Brenda W J H Penninx 140, Dorret Boomsma 23, Panos Deloukas 8, Timothy D Spector 8,9, Timothy M Frayling 28, Luigi Ferrucci 169, Augustine Kong 19, Unnur Thorsteinsdottir 19,170, Kari Stefansson 19,170, Cornelia M van Duijn 22, Yurii S Aulchenko 22, Antonio Cao 65, Angelo Scuteri 65, 171, David Schlessinger 47, Manuela Uda 65, Aimo Ruukonen 172, Marjo-Riitta Jarvelin 17,93,173, Dawn M Waterworth 26, Peter Vollenweider 141, Leena Peltonen 8,48,96,111,112, Vincent Mooser 26, Goncalo R Abecasis 10, Nicholas J Wareham 3, Robert Sladek 40,41, Philippe Froguel 13,142, Richard M Watanabe 164,174, James B Meigs 35,105, Leif Groop 102, Michael Boehnke 10, Mark I McCarthy 4,5,107, Jose C Florez 6,7,104,105, Inês Barroso 11

|   |                                                                                                          |
|---|----------------------------------------------------------------------------------------------------------|
| 1 | Department of Biostatistics, Boston University School of Public Health, Boston, Massachusetts 02118, USA |
| 2 | National Heart, Lung, and Blood Institute's Framingham Heart Study, Framingham, Massachusetts 01702, USA |
| 3 | MRC Epidemiology Unit, Institute of Metabolic Science, Addenbrooke's Hospital, Cambridge CB2 0QQ, UK     |
| 4 | Oxford Centre for Diabetes, Endocrinology and Metabolism, University of Oxford, Oxford OX3 7LJ, UK       |
| 5 | Wellcome Trust Centre for Human Genetics, University of Oxford, Oxford OX3 7BN, UK                       |
| 6 | Program in Medical and Population Genetics, Broad Institute, Cambridge, Massachusetts 02142, USA         |
| 7 | Center for Human Genetic Research, Massachusetts General Hospital, Boston, Massachusetts 02114, USA      |
| 8 | Wellcome Trust Sanger Institute, Hinxton, Cambridge CB10 1SA, UK                                         |

|    |                                                                                                                                                                  |
|----|------------------------------------------------------------------------------------------------------------------------------------------------------------------|
| 9  | Twin Research & Genetic Epidemiology Department, King's College London, St Thomas' Hospital Campus, Lambeth Palace Rd, London SE1 7EH, UK                        |
| 10 | Center for Statistical Genetics, Department of Biostatistics, University of Michigan School of Public Health, Ann Arbor, Michigan 48109, USA                     |
| 11 | Metabolic Disease Group, Wellcome Trust Sanger Institute, Hinxton, Cambridge CB10 1SA, UK                                                                        |
| 12 | Cardiovascular Health Research Unit and Department of Medicine, University of Washington, Seattle, Washington, USA                                               |
| 13 | CNRS-UMR8090, Pasteur Institute, Lille 2-Droit et Santé University, F-59000 Lille, France                                                                        |
| 14 | Department of Medical Genetics, University of Lausanne, 1005 Lausanne, Switzerland                                                                               |
| 15 | University Institute of Social and Preventative Medicine, Centre Hospitalier Universitaire Vaudois (CHUV) and University of Lausanne, 1005 Lausanne, Switzerland |
| 16 | Swiss Institute of Bioinformatics, Switzerland                                                                                                                   |
| 17 | Department of Epidemiology and Public Health, Imperial College of London, Faculty of Medicine, Norfolk Place, London W2 1PG, UK                                  |
| 18 | Boston University Data Coordinating Center, Boston, Massachusetts 02118, USA                                                                                     |
| 19 | deCODE Genetics, 101 Reykjavik, Iceland                                                                                                                          |
| 20 | Department of Human Genetics, Leiden University Medical Centre, 2300 RC Leiden, The Netherlands                                                                  |
| 21 | Institute of Epidemiology, Helmholtz Zentrum Muenchen, German Research Center for Environmental Health, 85764 Neuherberg, Germany                                |
| 22 | Department of Epidemiology, Erasmus MC Rotterdam, 3000 CA, The Netherlands                                                                                       |
| 23 | Department of Biological Psychology, VU, Van der Boechorststraat 1, 1081 BT Amsterdam, The Netherlands                                                           |
| 24 | Centre for Population Health Sciences, University of Edinburgh, Edinburgh EH8 9AG, UK                                                                            |
| 25 | MRC Human Genetics Unit, IGMM, Edinburgh EH4 2XU, UK                                                                                                             |
| 26 | Division of Genetics, R&D, Glaxo SmithKline, King of Prussia, Pennsylvania 19406, USA                                                                            |
| 27 | Department of Cardiovascular Medicine, University of Oxford, Oxford OX3 9DU, UK                                                                                  |
| 28 | Genetics of Complex Traits, Institute of Biomedical and Clinical Sciences, Peninsula College of Medicine and Dentistry, University of Exeter EX1 2LU, UK         |
| 29 | Laboratory of Clinical Investigation, National Institute of Aging, Baltimore, Maryland 21250, USA                                                                |
| 30 | Unit for Child and Adolescent Health and Welfare, National Institute for Health and Welfare, Biocenter Oulu, University of Oulu, 90014 Oulu, Finland             |
| 31 | Hagedorn Research Institute, 2820 Gentofte, Denmark                                                                                                              |
| 32 | Department of Medicine & Therapeutics, Level 7, Ninewells Hospital & Medical School, Dundee DD1 9SY, UK                                                          |

|    |                                                                                                                                       |
|----|---------------------------------------------------------------------------------------------------------------------------------------|
| 33 | Department of Epidemiology, Bloomberg School of Public Health, Johns Hopkins University, Baltimore, Maryland 21287, USA               |
| 34 | Department of Nutrition - Dietetics, Harokopio University, 17671 Athens, Greece                                                       |
| 35 | General Medicine Division, Massachusetts General Hospital, Boston, Massachusetts, USA                                                 |
| 36 | Department of Epidemiology and Public Health, University College London, UK                                                           |
| 37 | Depts. of Nutrition and Epidemiology, Harvard School of Public Health , Boston, Massachusetts, USA                                    |
| 38 | MRC Centre for Causal Analyses in Translational Epidemiology, University of Bristol, Bristol BS8 2PR, UK                              |
| 39 | Fundación para la Investigación Biomédica del Hospital Clínico San Carlos, Madrid, Spain                                              |
| 40 | Departments of Medicine and Human Genetics, McGill University, Montreal, Canada                                                       |
| 41 | Genome Quebec Innovation Centre, Montreal H3A 1A4, Canada                                                                             |
| 42 | Department of Medical Epidemiology and Biostatistics, Karolinska Institutet, Stockholm, Sweden                                        |
| 43 | Department of Public Health and Caring Sciences, Uppsala University, Uppsala, Sweden                                                  |
| 44 | Division of Statistical Genomics, Department of Genetics, Washington University School of Medicine, St. Louis, Missouri, USA          |
| 45 | Division of Endocrinology, Diabetes and Nutrition, University of Maryland School of Medicine, Baltimore, Maryland 21201, USA          |
| 46 | INSERM U859, Universite de Lille-Nord de France, F-59000 Lille, France                                                                |
| 47 | Genome Technology Branch, National Human Genome Research Institute, Bethesda, Maryland 20892, USA                                     |
| 48 | The Broad Institute, Cambridge, Massachusetts 02141, USA                                                                              |
| 49 | Leiden Genome Technology Center, Leiden University Medical Center, 2300 RC Leiden, The Netherlands                                    |
| 50 | INSERM U780-IFR69, Paris Sud University, F-94807 Villejuif, France                                                                    |
| 51 | The Heart Research Institute, Sydney, New South Wales, Australia                                                                      |
| 52 | PathWest Laboratory of Western Australia, Department of Molecular Genetics, J Block, QEII Medical Centre, NEDLANDS WA 6009, Australia |
| 53 | School of Surgery and Pathology, University of Western Australia, Nedlands WA 6009, Australia                                         |
| 54 | Department of Social Medicine, University of Bristol, Bristol BS8 2PR, UK                                                             |
| 55 | Landspítali University Hospital, 101 Reykjavik, Iceland                                                                               |
| 56 | Icelandic Heart Association, 201 Kopavogur, Iceland                                                                                   |
| 57 | The Human Genetics Center and Institute of Molecular Medicine, University of Texas Health Science Center, Houston, Texas 77030, USA   |
| 58 | Steno Diabetes Center, DK-2820 Gentofte, Copenhagen, Denmark                                                                          |
| 59 | Faculty of Health Science, University of Aarhus, Aarhus DK-8000, Denmark                                                              |
| 60 | Department of Medicine, University of Leipzig, Liebigstr. 18, 04103 Leipzig, Germany                                                  |
| 61 | Endocrinology-Diabetology Unit, Corbeil-Essonnes Hospital, Essonnes, F-91108 France                                                   |
| 62 | Medical Genetics Institute, Cedars-Sinai Medical Center, Los Angeles,                                                                 |

|    |                                                                                                                                                                                             |
|----|---------------------------------------------------------------------------------------------------------------------------------------------------------------------------------------------|
|    | California, USA                                                                                                                                                                             |
| 63 | Clinical Trial Service Unit and Epidemiological Studies Unit, University of Oxford, Oxford OX3 7LF, UK                                                                                      |
| 64 | Centre for Genetic Epidemiology and Biostatistics, University of Western Australia, Perth, Australia                                                                                        |
| 65 | Istituto di Neurogenetica e Neurofarmacologia (INN), Consiglio Nazionale delle Ricerche, c/o Cittadella Universitaria di Monserrato, Monserrato, Cagliari 09042, Italy                      |
| 66 | Western Australian Sleep Disorders Research Institute, Queen Elizabeth Medical Centre II, Perth, Australia                                                                                  |
| 67 | Department of Endocrinology, Diabetes and Nutrition, Charite-Universitaetsmedizin Berlin, Berlin, Germany                                                                                   |
| 68 | Department of Clinical Nutrition, German Institute of Human Nutrition Potsdam-Rehbruecke, Nuthetal, Germany                                                                                 |
| 69 | Division of Endocrinology, Diabetes, and Hypertension, Brigham and Women's Hospital, Harvard Medical School, Boston, Massachusetts, USA                                                     |
| 70 | Department of Human Genetics, Leiden University Medical Centre, 2300 RC Leiden, The Netherlands                                                                                             |
| 71 | Department of Cardiovascular Research, Istituto di Ricerche Farmacologiche 'Mario Negri', Milan, Italy                                                                                      |
| 72 | U557 Institut National de la Santé et de la Recherche Médicale, U1125 Institut National de la Recherche Agronomique, Université Paris 13, 74 rue Marcel Cachin, 93017 Bobigny Cedex, France |
| 73 | Department of Medicine III, Division Prevention and Care of Diabetes, University of Dresden, 01307 Dresden                                                                                  |
| 74 | Center for Human Nutrition, University of Texas Southwestern Medical Center, Dallas, Texas, USA                                                                                             |
| 75 | Department of Genetics and Pathology, Rudbeck Laboratory, Uppsala University, S-751 85 Uppsala, Sweden                                                                                      |
| 76 | CHU de Poitiers, Endocrinologie Diabetologie, CIC INSERM 0802, INSERM U927, Université de Poitiers, UFR, Médecine Pharmacie, Poitiers, France                                               |
| 77 | Department of Public Health & Clinical Medicine, Section for Nutritional Research, Umeå University, Umeå, Sweden                                                                            |
| 78 | Department of Clinical Sciences , Obstetrics and Gynecology, University of Oulu, Box 5000, Fin-90014 University of Oulu, Finland                                                            |
| 79 | Centre National de Génotypage/IG/CEA, 2 rue Gaston Crémieux CP 5721, 91057 Evry Cedex, France                                                                                               |
| 80 | U872 Institut National de la Santé et de la Recherche Médicale, Faculté de Médecine Paris Descartes, 15 rue de l'Ecole de Médecine, 75270 Paris Cedex, France                               |
| 81 | Institute for Clinical Diabetology, German Diabetes Center, Leibniz Center for Diabetes Research at Heinrich Heine University Düsseldorf, 40225 Düsseldorf, Germany                         |
| 82 | Institute of Genetic Medicine, European Academy Bozen/Bolzano (EURAC), Viale Druso 1, 39100 Bolzano, Italy, Affiliated Institute of the University Lübeck, Germany                          |
| 83 | Department of Pulmonary Physiology, Sir Charles Gairdner Hospital, Perth, Australia                                                                                                         |
| 84 | Busselton Population Medical Research Foundation, Sir Charles Gairdner                                                                                                                      |

|     |                                                                                                                                                        |
|-----|--------------------------------------------------------------------------------------------------------------------------------------------------------|
|     | Hospital, Perth, Australia                                                                                                                             |
| 85  | Heart Institute of Western Australia, Sir Charles Gairdner Hospital, Nedlands WA 6009, Australia                                                       |
| 86  | School of Medicine and Pharmacology, University of Western Australia, Nedlands, WA 6009, Australia                                                     |
| 87  | Folkhalsan Research Centre, Helsinki, Finland                                                                                                          |
| 88  | Malmska Municipal Health Care Center and Hospital, Jakobstad, Finland                                                                                  |
| 89  | Nuffield Department of Surgery, University of Oxford, Oxford OX3 9DU, UK                                                                               |
| 90  | Research Centre for Prevention and Health, Glostrup University Hospital, Glostrup, Denmark                                                             |
| 91  | Faculty of Health Science, University of Copenhagen, Copenhagen, Denmark                                                                               |
| 92  | National Institute for Health and Welfare, Unit of Population Studies, Turku, Finland                                                                  |
| 93  | Institute of Health Sciences and Biocenter Oulu, Box 5000, Fin-90014 University of Oulu, Finland                                                       |
| 94  | Department of Public Health, Faculty of Medicine, P.O. Box 41 (Mannerheimintie 172), University of Helsinki, 00014 Helsinki, Finland                   |
| 95  | National Institute for Health and Welfare, Unit for Child and Adolescent Mental Health, Helsinki, Finland                                              |
| 96  | Institute for Molecular Medicine Finland FIMM, University of Helsinki, Helsinki, Finland                                                               |
| 97  | Department of Internal Medicine and Biocenter Oulu, Oulu, Finland                                                                                      |
| 98  | Diabetes Genetics, Institute of Biomedical and Clinical Science, Peninsula College of Medicine and Dentistry, University of Exeter, Exeter EX2 5DW, UK |
| 99  | National Institute for Health and Welfare, Unit of Living Conditions, Health and Wellbeing, Helsinki, Finland                                          |
| 100 | Interdisciplinary Centre for Clinical Research, University of Leipzig, Inselstr. 22, 04103 Leipzig, Germany                                            |
| 101 | The Danish Twin Registry, Epidemiology, Institute of Public Health, University of Southern Denmark, J.B. Winsløvs Vej 9B, 5000 Odense, Denmark         |
| 102 | Department of Clinical Sciences, Diabetes and Endocrinology, Lund University, University Hospital Malmo, Malmo, Sweden                                 |
| 103 | Gladstone Institute of Cardiovascular Disease, University of California, San Francisco, California, USA                                                |
| 104 | Diabetes Research Center (Diabetes Unit), Massachusetts General Hospital, Boston, Massachusetts 02114, USA                                             |
| 105 | Department of Medicine, Harvard Medical School, Boston, Massachusetts 02115, USA                                                                       |
| 106 | Division of Cardiology, University of Ottawa Heart Institute, Ottawa, Ontario, Canada                                                                  |
| 107 | Oxford NIHR Biomedical Research Centre, Churchill Hospital, Oxford OX3 7LJ, UK                                                                         |
| 108 | Department of Clinical Genetics, Erasmus MC Rotterdam, 3000 CA, The Netherlands                                                                        |
| 109 | Biomedical Research Institute, University of Dundee, Ninewells Hospital & Medical School, Dundee DD1 9SY, UK                                           |
| 110 | Department of Geriatric Medicine and Metabolic Disease, Second University of Naples, Naples, Italy.                                                    |
| 111 | National Institute for Health and Welfare, Unit of Public Health Genomics,                                                                             |

|     |                                                                                                                                                                                                |
|-----|------------------------------------------------------------------------------------------------------------------------------------------------------------------------------------------------|
|     | Helsinki, Finland                                                                                                                                                                              |
| 112 | Department of Medical Genetics, University of Helsinki, Helsinki, Finland                                                                                                                      |
| 113 | Department of Medical Statistics, Epidemiology and Medical Informatics, Andrija Stampar School of Public Health, Medical School, University of Zagreb, Rockefellerova 4, 10000 Zagreb, Croatia |
| 114 | Department of Clinical Genetics, VUMC, Van der Boechorststraat 7, 1081 BT Amsterdam, The Netherlands                                                                                           |
| 115 | Department of Obstetrics and Gynaecology, Oulu University Hospital, Oulu, Finland                                                                                                              |
| 116 | Departments of Medicine, Epidemiology, and Health Services, University of Washington, Seattle, Washington, USA                                                                                 |
| 117 | Group Health Center for Health Studies, Seattle, Washington, USA                                                                                                                               |
| 118 | Institute of Biometrics and Epidemiology, German Diabetes Centre, Leibniz Centre at Heinrich Heine University Düsseldorf, Düsseldorf, Germany                                                  |
| 119 | Department of Biostatistics, University of Washington, Seattle, Washington 98195, USA                                                                                                          |
| 120 | Department of Internal Medicine, Erasmus MC Rotterdam, 3000 CA, The Netherlands                                                                                                                |
| 121 | Department of Medicine/Metabolic Diseases, Heinrich Heine University Düsseldorf, 40225 Düsseldorf, Germany                                                                                     |
| 122 | Department of Public Health & Clinical Medicine, Section for Family Medicine, Umeå University Hospital, Umeå, Sweden                                                                           |
| 123 | School of Public Health, Department of General Practice, University of Aarhus, Aarhus DK-8000, Denmark                                                                                         |
| 124 | Department of Public Health and Primary Care, Strangeways Research Laboratory, University of Cambridge, Cambridge, UK                                                                          |
| 125 | MRC Epidemiology Resource Centre, University of Southampton, Southampton General Hospital, Southampton SO16 6YD, UK                                                                            |
| 126 | Department of Epidemiology, University of Texas, M.D. Anderson Cancer Center, Houston, Texas, 77030, USA                                                                                       |
| 127 | Leibniz-Institut für Arterioskleroseforschung an der Universität Münster, Münster, Germany                                                                                                     |
| 128 | Atherosclerosis Research Unit, Department of Medicine, Karolinska Institutet, Stockholm, Sweden                                                                                                |
| 129 | Laboratory of Neurogenetics, National Institute on Aging, Bethesda, Maryland 20892, USA                                                                                                        |
| 130 | Department of Epidemiology, University of Washington, Seattle, Washington 98195, USA                                                                                                           |
| 131 | Seattle Epidemiologic Research and Information Center, Department of Veterans Affairs Office of Research and Development, Seattle, Washington, USA                                             |
| 132 | Department of Medical Sciences, Uppsala University, Uppsala, Sweden                                                                                                                            |
| 133 | Medstar Research Institute, Baltimore, Maryland 21250, USA                                                                                                                                     |
| 134 | Clinical Research Branch, National Institute on Aging, Baltimore, Maryland 21250, USA                                                                                                          |
| 135 | Institut interrégional pour la santé (IRSA), F-37521 La Riche, France                                                                                                                          |
| 136 | Coordination Centre for Clinical Trials, University of Leipzig, Härtelstr. 16-18, 04103 Leipzig, Germany                                                                                       |

|     |                                                                                                                                                                                          |
|-----|------------------------------------------------------------------------------------------------------------------------------------------------------------------------------------------|
| 137 | Department of Medicine, Helsinki University Hospital, University of Helsinki, Helsinki, Finland                                                                                          |
| 138 | Department of Internal Medicine, Leiden University Medical Centre, 2300 RC Leiden, The Netherlands                                                                                       |
| 139 | Research Unit, Cardiovascular Genetics, Nancy University Henri Poincaré, Nancy, France                                                                                                   |
| 140 | EMGO Institute/Department of Psychiatry, VU University Medical Center, Amsterdam, The Netherlands                                                                                        |
| 141 | Department of Internal Medicine, Centre Hospitalier Universitaire Vaudois, 1011 Lausanne, Switzerland                                                                                    |
| 142 | Genomic Medicine, Imperial College London, Hammersmith Hospital, W12 0NN, London, UK                                                                                                     |
| 143 | Epidemiology & Public Health, Queen's University Belfast, Belfast BT12 6BJ, UK                                                                                                           |
| 144 | Medical Products Agency, Uppsala, Sweden                                                                                                                                                 |
| 145 |                                                                                                                                                                                          |
| 146 | National Institute for Health and Welfare, Unit of Chronic Disease Epidemiology and Prevention, Helsinki, Finland                                                                        |
| 147 | Departments of Nutrition and Epidemiology, Harvard School of Public Health , Boston, Massachusetts, USA                                                                                  |
| 148 | Channing Laboratory, Brigham and Women's Hospital and Harvard Medical School, Boston, Massachusetts, USA                                                                                 |
| 149 | Genetic Epidemiology & Clinical Research Group, Department of Public Health & Clinical Medicine, Section for Medicine, Umeå University Hospital, Umeå, Sweden                            |
| 150 | London School of Hygiene and Tropical Medicine, London WC1E 7HT, UK                                                                                                                      |
| 151 | Department of Medicine, School of Medicine, Johns Hopkins University, Baltimore, Maryland 21287, USA                                                                                     |
| 152 | The Welch Center for Prevention, Epidemiology, and Clinical Research, School of Medicine and Bloomberg School of Public Health, Johns Hopkins University, Baltimore, Maryland 21287, USA |
| 153 | Division of Epidemiology and Community Health, School of Public Health, University of Minnesota, Minneapolis, Minnesota 55454, USA                                                       |
| 154 | Department of Endocrinology and Diabetes, Norfolk and Norwich University Hospital NHS Trust , Norwich, NR1 7UY, UK                                                                       |
| 155 | Department of Medicine, University of Kuopio and Kuopio University Hospital, Kuopio 70210, Finland                                                                                       |
| 156 | Faculty of Health Science, University of Southern Denmark, Odense, Denmark                                                                                                               |
| 157 | Institute of Biomedical Science, Faculty of Health Science, University of Copenhagen, Denmark                                                                                            |
| 158 | Department of Neurology, General Central Hospital, 39100 Bolzano, Italy                                                                                                                  |
| 159 | Department of Neurology, University of Lübeck, Ratzeburger Allee 160, 23538 Lübeck, Germany                                                                                              |
| 160 | Institute of Medical Informatics, Biometry and Epidemiology, Ludwig-Maximilians-Universität, Munich, Germany                                                                             |
| 161 | Klinikum Grosshadern, Munich, Germany                                                                                                                                                    |
| 162 | School of Medicine, University of Split, Soltanska 2, 21000 Split, Croatia                                                                                                               |
| 163 | Gen-Info Ltd, Ruzmarinka 17, 10000 Zagreb, Croatia                                                                                                                                       |

|     |                                                                                                                                                   |
|-----|---------------------------------------------------------------------------------------------------------------------------------------------------|
| 164 | Department of Physiology and Biophysics, Keck School of Medicine, University of Southern California, Los Angeles, California 90033, USA           |
| 165 | Department of Medicine, Division of Endocrinology, Keck School of Medicine, University of Southern California, Los Angeles, California 90033, USA |
| 166 | Department of Genetics, University of North Carolina, Chapel Hill, North Carolina 27599, USA                                                      |
| 167 | National Institute for Health and Welfare, Unit of Diabetes Prevention, Helsinki, Finland                                                         |
| 168 | Departments of Medicine and Epidemiology, University of Washington, Seattle, Washington, USA                                                      |
| 169 | Longitudinal Studies Section, Clinical Research Branch, National Institute on Aging, NIH, Baltimore, Maryland, USA                                |
| 170 | Faculty of Medicine, University of Iceland, 101 Reykjavík, Iceland                                                                                |
| 171 | Lab of Cardiovascular Sciences, National Institute on Aging, NIH, Baltimore, Maryland, USA                                                        |
| 172 | Department of Clinical Sciences/Clinical Chemistry, University of Oulu, Box 5000, Fin-90014 University of Oulu, Finland                           |
| 173 | National Institute of Health and Welfare, Aapistie 1, P.O. Box 310, Fin-90101 Oulu, Finland                                                       |
| 174 | Department of Preventive Medicine, Keck School of Medicine, University of Southern California, Los Angeles, California, 90033, USA                |
